# Supplementary material
Source: publisher figshare collection journal article supplement (https://acs.figshare.com/ndownloader/files/3844768)
Supplement: Supplementary file 1 [file 3844768]

# Set B - Experiment # 2

Set B - Experiment # 2

|                               |                                              | FL/C Raw |          |          | FD/C     |           |           |             |          |           |           |         |              |
|-------------------------------|----------------------------------------------|----------|----------|----------|----------|-----------|-----------|-------------|----------|-----------|-----------|---------|--------------|
|                               |                                              | F/C Raw  | F/C Norm | F/C Log2 | FD/C Raw | FD/C Norm | FD/C Log2 |             |          |           |           |         |              |
| Number of Proteins            |                                              | 601      | 601      | 601      | 601      | 601       | 601       |             |          |           |           |         |              |
| Max                           |                                              | 1.84     | 2.43     | 1.28     | 1.29     | 1.96      | 0.97      |             |          |           |           |         |              |
| Min                           |                                              | 0.32     | 0.42     | -1.24    | 0.19     | 0.29      | -1.79     |             |          |           |           |         |              |
| Range                         |                                              |          |          | 2.52     |          |           | 2.76      |             |          |           |           |         |              |
| Mean                          |                                              | 0.76     | 1.00     | -0.04    | 0.66     | 1.00      | -0.03     |             |          |           |           |         |              |
| Standard Deviation (SD)       |                                              | 0.20     | 0.26     | 0.33     | 0.14     | 0.22      | 0.31      |             |          |           |           |         |              |
| 2 x Standard Deviation (2SD)  |                                              | 0.39     | 0.52     | 0.66     | 0.29     | 0.44      | 0.62      |             |          |           |           |         |              |
| Coefficient of Deviation (CV) |                                              | 0.26     | 0.26     |          | 0.22     | 0.22      |           |             |          |           |           |         |              |
| Accession                     | Protein                                      | Score    | #Pep     | F/C Raw  | F/C Norm | F/C Log2  | #(F/C)    | CV [%](F/K) | FD/C Raw | FD/C Norm | FD/C Log2 | #(FD/C) | CV [%](FD/C) |
| gi 321476145 gb EFX87106.1    | myosin heavy chain isoform 3                 | 4443     | 70       | 0.52     | 0.69     | -0.54     | 69        | 29.39       | 0.48     | 0.73      | -0.45     | 67      | 27.57        |
| gi 321467011 gb EFX78003.1    | hypothetical protein DAPPUDRAFT_305290       | 3821     | 65       | 0.75     | 0.99     | -0.01     | 64        | 19.74       | 0.67     | 1.02      | 0.03      | 63      | 16.37        |
| gi 321451065 gb EFX62844.1    | vitellogenin fused with superoxide dismutase | 3112     | 52       | 0.62     | 0.82     | -0.29     | 51        | 36.21       | 0.51     | 0.78      | -0.36     | 51      | 44.24        |
| gi 321465377 gb EFX76379.1    | vitellogenin fused with superoxide dismutase | 2733     | 2        | 0.80     | 1.06     | 0.08      | 2         | 5.21        | 0.50     | 0.76      | -0.39     | 2       | 4.23         |
| gi 321478700 gb EFX89657.1    | muscle-specific actin                        | 2614     | 38       | 0.69     | 0.91     | -0.13     | 36        | 37.01       | 0.65     | 0.99      | -0.01     | 36      | 31.28        |
| gi 321475473 gb EFX86436.1    | hypothetical protein DAPPUDRAFT_208250       | 2426     | 39       | 0.70     | 0.92     | -0.11     | 39        | 25.84       | 0.65     | 0.99      | -0.01     | 39      | 17.86        |
| gi 321476661 gb EFX87621.1    | cytoplasmatic actin                          | 2415     | 10       | 0.65     | 0.86     | -0.22     | 9         | 16.08       | 0.56     | 0.85      | -0.23     | 9       | 20.99        |
| gi 321469729 gb EFX80708.1    | hypothetical protein DAPPUDRAFT_318420       | 2357     | 43       | 0.66     | 0.87     | -0.20     | 43        | 23.71       | 0.54     | 0.82      | -0.28     | 42      | 26.18        |
| gi 321477594 gb EFX88552.1    | hypothetical protein DAPPUDRAFT_304661       | 2048     | 35       | 0.66     | 0.87     | -0.20     | 35        | 14.63       | 0.55     | 0.84      | -0.26     | 35      | 15.75        |
| gi 321473812 gb EFX84778.1    | hypothetical protein DAPPUDRAFT_99081        | 1579     | 25       | 0.63     | 0.83     | -0.27     | 25        | 13.89       | 0.56     | 0.85      | -0.23     | 24      | 11.89        |
| gi 321479063 gb EFX90019.1    | hypothetical protein DAPPUDRAFT_309746       | 1472     | 17       | 0.59     | 0.78     | -0.36     | 17        | 17.07       | 0.54     | 0.82      | -0.28     | 17      | 26.76        |
| gi 321454575 gb EFX65740.1    | hypothetical protein DAPPUDRAFT_65262        | 1342     | 22       | 0.71     | 0.94     | -0.09     | 22        | 16.38       | 0.64     | 0.97      | -0.04     | 22      | 22.03        |
| gi 321477714 gb EFX88672.1    | hypothetical protein DAPPUDRAFT_206384       | 1332     | 22       | 0.68     | 0.91     | -0.13     | 21        | 13.32       | 0.62     | 0.94      | -0.08     | 22      | 20.84        |
| gi 321477114 gb EFX88073.1    | alpha subunit of putative Na+/K+ ATPase      | 1320     | 18       | 0.70     | 0.92     | -0.11     | 18        | 16.15       | 0.60     | 0.91      | -0.13     | 17      | 11.08        |
| gi 321478205 gb EFX89163.1    | hypothetical protein DAPPUDRAFT_220693       | 1290     | 17       | 0.60     | 0.79     | -0.34     | 17        | 22.89       | 0.50     | 0.76      | -0.39     | 16      | 13.00        |
| gi 321465380 gb EFX76382.1    | hypothetical protein DAPPUDRAFT_213992       | 1279     | 21       | 0.67     | 0.88     | -0.18     | 20        | 16.22       | 0.47     | 0.72      | -0.48     | 21      | 27.55        |
| gi 321463104 gb EFX74122.1    | hypothetical protein DAPPUDRAFT_307476       | 1195     | 18       | 0.68     | 0.90     | -0.16     | 18        | 22.02       | 0.58     | 0.88      | -0.18     | 17      | 15.22        |
| gi 321460863 gb EFX71901.1    | hypothetical protein DAPPUDRAFT_308693       | 1138     | 15       | 1.29     | 1.70     | 0.77      | 15        | 71.54       | 0.94     | 1.43      | 0.52      | 15      | 44.24        |
| gi 321459288 gb EFX70343.1    | hypothetical protein DAPPUDRAFT_231635       | 1088     | 19       | 0.70     | 0.92     | -0.11     | 19        | 18.71       | 0.62     | 0.94      | -0.08     | 19      | 18.43        |
| gi 321478982 gb EFX89938.1    | hypothetical protein DAPPUDRAFT_230081       | 1075     | 18       | 0.55     | 0.73     | -0.46     | 18        | 22.64       | 0.50     | 0.76      | -0.39     | 18      | 16.16        |
| gi 321477893 gb EFX88851.1    | hypothetical protein DAPPUDRAFT_234212       | 1064     | 14       | 0.58     | 0.77     | -0.39     | 14        | 21.81       | 0.53     | 0.81      | -0.31     | 14      | 28.43        |
| gi 321470928 gb EFX81902.1    | hypothetical protein DAPPUDRAFT_302856       | 1054     | 16       | 0.70     | 0.92     | -0.11     | 15        | 14.12       | 0.60     | 0.91      | -0.13     | 16      | 22.14        |
| gi 321453967 gb EFX65159.1    | paramyosin                                   | 1045     | 15       | 0.60     | 0.79     | -0.34     | 15        | 15.93       | 0.51     | 0.78      | -0.36     | 15      | 17.52        |
| gi 321459762 gb EFX70812.1    | hypothetical protein DAPPUDRAFT_309281       | 1023     | 15       | 0.60     | 0.79     | -0.34     | 15        | 29.15       | 0.49     | 0.75      | -0.42     | 15      | 25.52        |
| gi 321477717 gb EFX88675.1    | hypothetical protein DAPPUDRAFT_304735       | 996      | 13       | 0.69     | 0.91     | -0.13     | 13        | 15.84       | 0.55     | 0.84      | -0.26     | 13      | 21.24        |
| gi 321479393 gb EFX90349.1    | hypothetical protein DAPPUDRAFT_300069       | 992      | 18       | 0.69     | 0.91     | -0.13     | 17        | 21.69       | 0.63     | 0.96      | -0.06     | 16      | 15.77        |
| gi 321460281 gb EFX71325.1    | hypothetical protein DAPPUDRAFT_308937       | 976      | 14       | 0.85     | 1.12     | 0.17      | 14        | 22.81       | 0.80     | 1.22      | 0.29      | 14      | 22.73        |
| gi 321477015 gb EFX87974.1    | hypothetical protein DAPPUDRAFT_305638       | 968      | 13       | 0.67     | 0.88     | -0.18     | 13        | 20.90       | 0.55     | 0.84      | -0.26     | 13      | 13.50        |
| gi 387864070 gb AFK09563.1    | actin, partial                               | 933      | 1        | 0.93     | 1.23     | 0.30      | 1         |             | 0.83     | 1.26      | 0.34      | 1       |              |
| gi 321478016 gb EFX88974.1    | hypothetical protein DAPPUDRAFT_220904       | 830      | 12       | 0.53     | 0.70     | -0.52     | 12        | 28.15       | 0.47     | 0.72      | -0.48     | 12      | 18.34        |
| gi 524845790 gb AGR34129.1    | Hsp90                                        | 823      | 13       | 0.61     | 0.81     | -0.31     | 13        | 18.38       | 0.57     | 0.87      | -0.20     | 13      | 19.72        |
| gi 321472551 gb EFX83521.1    | hypothetical protein DAPPUDRAFT_301837       | 820      | 1        | 0.51     | 0.67     | -0.57     | 1         |             | 0.40     | 0.61      | -0.71     | 1       |              |
| gi 321460058 gb EFX71104.1    | alpha subunit of putative Na+/K+ ATPase      | 817      | 4        | 0.76     | 1.00     | 0.00      | 4         | 38.97       | 0.54     | 0.82      | -0.28     | 4       | 14.92        |
| gi 321472355 gb EFX83325.1    | hypothetical protein DAPPUDRAFT_100611       | 784      | 2        | 0.50     | 0.66     | -0.60     | 2         | 3.62        | 0.47     | 0.72      | -0.48     | 2       | 5.24         |
| gi 321472356 gb EFX83326.1    | hypothetical protein DAPPUDRAFT_315805       | 774      | 1        | 0.60     | 0.79     | -0.34     | 1         |             | 0.40     | 0.61      | -0.71     | 1       |              |
| gi 321479129 gb EFX90085.1    | hypothetical protein DAPPUDRAFT_232498       | 774      | 12       | 0.73     | 0.96     | -0.05     | 11        | 12.30       | 0.73     | 1.11      | 0.15      | 12      | 31.27        |
| gi 321477882 gb EFX88840.1    | hypothetical protein DAPPUDRAFT_234231       | 769      | 13       | 0.77     | 1.02     | 0.02      | 13        | 18.95       | 0.54     | 0.82      | -0.28     | 13      | 22.71        |
| gi 321476668 gb EFX87628.1    | hypothetical protein DAPPUDRAFT_306451       | 761      | 11       | 0.58     | 0.77     | -0.39     | 11        | 25.13       | 0.53     | 0.81      | -0.31     | 11      | 16.84        |
| gi 321459623 gb EFX70674.1    | hypothetical protein DAPPUDRAFT_256736       | 760      | 6        | 0.66     | 0.87     | -0.20     | 6         | 33.50       | 0.54     | 0.82      | -0.28     | 6       | 47.08        |
| gi 321474512 gb EFX85477.1    | hypothetical protein DAPPUDRAFT_300308       | 756      | 14       | 0.67     | 0.88     | -0.18     | 14        | 20.90       | 0.50     | 0.76      | -0.39     | 13      | 19.72        |
| gi 321474303 gb EFX85268.1    | hypothetical protein DAPPUDRAFT_300259       | 736      | 2        | 0.68     | 0.90     | -0.16     | 2         | 25.61       | 0.55     | 0.84      | -0.26     | 2       | 47.13        |
| gi 321472306 gb EFX83276.1    | enolase                                      | 734      | 10       | 0.74     | 0.98     | -0.03     | 10        | 11.12       | 0.67     | 1.02      | 0.03      | 10      | 27.37        |
| gi 321477402 gb EFX88361.1    | alpha subunit of putative Na+/K+ ATPase      | 726      | 4        | 0.65     | 0.86     | -0.22     | 4         | 27.79       | 0.63     | 0.96      | -0.06     | 4       | 6.59         |
| gi 321462784 gb EFX73805.1    | cytoplasmatic actin                          | 715      | 1        | 0.48     | 0.63     | -0.66     | 1         |             | 0.51     | 0.78      | -0.36     | 1       |              |
| gi 321475349 gb EFX86312.1    | hypothetical protein DAPPUDRAFT_308519       | 715      | 11       | 0.68     | 0.90     | -0.16     | 11        | 35.18       | 0.72     | 1.10      | 0.13      | 11      | 30.08        |
| gi 321477127 gb EFX88086.1    | hypothetical protein DAPPUDRAFT_96311        | 712      | 13       | 1.48     | 1.95     | 0.97      | 12        | 58.03       | 0.96     | 1.46      | 0.55      | 12      | 33.53        |
| gi 321455335 gb EFX66471.1    | hypothetical protein DAPPUDRAFT_204033       | 696      | 9        | 0.72     | 0.95     | -0.07     | 9         | 15.37       | 0.63     | 0.96      | -0.06     | 9       | 11.36        |
| gi 5881967 gb AAD55141.1      | AF07472 di-domain hemoglobin precursor       | 687      | 6        | 0.69     | 0.91     | -0.13     | 6         | 31.39       | 0.73     | 1.11      | 0.15      | 6       | 23.58        |
| gi 321473457 gb EFX84424.1    | hypothetical protein DAPPUDRAFT_301074       | 687      | 11       | 0.66     | 0.87     | -0.20     | 10        | 19.82       | 0.59     | 0.90      | -0.15     | 10      | 21.39        |
| gi 321479121 gb EFX90077.1    | hypothetical protein DAPPUDRAFT_299913       | 686      | 9        | 0.63     | 0.83     | -0.27     | 9         | 14.85       | 0.49     | 0.75      | -0.42     | 9       | 17.87        |
| gi 321473765 gb EFX84732.1    | hypothetical protein DAPPUDRAFT_314628       | 649      | 12       | 0.74     | 0.98     | -0.03     | 12        | 24.24       | 0.72     | 1.10      | 0.13      | 12      | 24.05        |
| gi 321455885 gb EFX67006.1    | hypothetical protein DAPPUDRAFT_218819       | 646      | 12       | 0.65     | 0.86     | -0.22     | 12        | 14.16       | 0.58     | 0.88      | -0.18     | 12      | 21.98        |
| gi 321473506 gb EFX84473.1    | hypothetical protein DAPPUDRAFT_194472       | 642      | 4        | 0.66     | 0.87     | -0.20     | 4         | 10.54       | 0.58     | 0.88      | -0.18     | 4       | 4.60         |
| gi 321476712 gb EFX87672.1    | hypothetical protein DAPPUDRAFT_306455       | 639      | 10       | 0.55     | 0.73     | -0.46     | 10        | 16.64       | 0.54     | 0.82      | -0.28     | 10      | 22.96        |
| gi 321473398 gb EFX84365.1    | hypothetical protein DAPPUDRAFT_127740       | 612      | 9        | 0.78     | 1.03     | 0.04      | 9         | 22.42       | 0.70     | 1.07      | 0.09      | 9       | 20.11        |
| gi 321453279 gb EFX64530.1    | hypothetical protein DAPPUDRAFT_334106       | 612      | 12       | 0.68     | 0.90     | -0.16     | 12        | 25.67       | 0.59     | 0.90      | -0.15     | 11      | 20.14        |
| gi 321475312 gb EFX86275.1    | hypothetical protein DAPPUDRAFT_313359       | 607      | 10       | 0.71     | 0.94     | -0.09     | 10        | 15.20       | 0.53     | 0.81      | -0.31     | 10      | 16.88        |
| gi 321471733 gb EFX82705.1    | hypothetical protein DAPPUDRAFT_210624       | 596      | 10       | 0.70     | 0.92     | -0.11     | 10        | 14.94       | 0.67     | 1.02      | 0.03      | 10      | 19.01        |
| gi 321474022 gb EFX84988.1    | hypothetical protein DAPPUDRAFT_300823       | 586      | 12       | 0.75     | 0.99     | -0.01     | 12        | 17.45       | 0.77     | 1.17      | 0.23      | 12      | 23.82        |
| gi 321459826 gb EFX70875.1    | hypothetical protein DAPPUDRAFT_327753       | 562      | 11       | 0.75     | 0.99     | -0.01     | 11        | 8.83        | 0.58     | 0.88      | -0.18     | 11      | 11.54        |
| gi 321466184 gb EFX77181.1    | hypothetical protein DAPPUDRAFT_321711       | 559      | 11       | 0.77     | 1.02     | 0.02      | 11        | 30.15       | 0.74     | 1.13      | 0.17      | 11      | 22.21        |
| gi 321466114 gb EFX77111.1    | hypothetical protein DAPPUDRAFT_213575       | 538      | 9        | 0.57     | 0.75     | -0.41     | 9         | 23.67       | 0.66     | 1.01      | 0.01      | 9       | 15.62        |
| gi 321458608 gb EFX69673.1    | hypothetical protein DAPPUDRAFT_300845       | 532      | 1        | 0.67     | 0.88     | -0.18     | 1         |             | 0.70     | 1.07      | 0.09      | 1       |              |

|                             |                                              |     |    |      |      |       |    |       |      |      |       |    |       |
|-----------------------------|----------------------------------------------|-----|----|------|------|-------|----|-------|------|------|-------|----|-------|
| gi 321471061 gb EFX82035.1  | hypothetical protein DAPPUDRAFT_302845       | 525 | 2  | 0.52 | 0.69 | -0.54 | 2  | 16.38 | 0.60 | 0.91 | -0.13 | 2  | 4.39  |
| gi 321455316 gb EFX66452.1  | hypothetical protein DAPPUDRAFT_302682       | 522 | 10 | 0.67 | 0.88 | -0.18 | 10 | 10.68 | 0.55 | 0.84 | -0.26 | 10 | 24.41 |
| gi 321473003 gb EFX83971.1  | hypothetical protein DAPPUDRAFT_223052       | 510 | 8  | 0.80 | 1.06 | 0.08  | 8  | 19.46 | 0.75 | 1.14 | 0.19  | 8  | 17.50 |
| gi 321476491 gb EFX87452.1  | hypothetical protein DAPPUDRAFT_230422       | 495 | 7  | 0.62 | 0.82 | -0.29 | 7  | 17.68 | 0.53 | 0.81 | -0.31 | 7  | 11.26 |
| gi 321466115 gb EFX77112.1  | hypothetical protein DAPPUDRAFT_231133       | 494 | 7  | 0.67 | 0.88 | -0.18 | 7  | 9.67  | 0.54 | 0.82 | -0.28 | 7  | 16.79 |
| gi 385047928 gb AFI39725.1  | enolase, partial                             | 488 | 1  | 0.71 | 0.94 | -0.09 | 1  |       | 0.63 | 0.96 | -0.06 | 1  |       |
| gi 321472565 gb EFX83535.1  | hypothetical protein DAPPUDRAFT_301901       | 476 | 2  | 0.69 | 0.91 | -0.13 | 2  | 24.36 | 0.71 | 1.08 | 0.11  | 2  | 18.09 |
| gi 321478018 gb EFX88976.1  | myosin regulatory light chain                | 455 | 9  | 0.62 | 0.82 | -0.29 | 9  | 14.08 | 0.58 | 0.88 | -0.18 | 9  | 13.41 |
| gi 321473522 gb EFX84489.1  | hypothetical protein DAPPUDRAFT_314822       | 454 | 7  | 0.80 | 1.06 | 0.08  | 6  | 9.16  | 0.68 | 1.04 | 0.05  | 6  | 9.85  |
| gi 321459825 gb EFX70874.1  | hypothetical protein DAPPUDRAFT_309273       | 453 | 7  | 0.73 | 0.96 | -0.05 | 7  | 12.86 | 0.60 | 0.91 | -0.13 | 7  | 15.01 |
| gi 321473279 gb EFX84247.1  | hypothetical protein DAPPUDRAFT_230626       | 447 | 10 | 0.80 | 1.06 | 0.08  | 10 | 10.98 | 0.73 | 1.11 | 0.15  | 10 | 13.18 |
| gi 321463228 gb EFX74245.1  | hypothetical protein DAPPUDRAFT_307391       | 431 | 7  | 0.73 | 0.96 | -0.05 | 7  | 26.66 | 0.65 | 0.99 | -0.01 | 7  | 22.76 |
| gi 321478254 gb EFX89211.1  | hypothetical protein DAPPUDRAFT_190431       | 422 | 9  | 0.72 | 0.95 | -0.07 | 9  | 22.82 | 0.70 | 1.07 | 0.09  | 9  | 23.08 |
| gi 321472714 gb EFX83683.1  | hypothetical protein DAPPUDRAFT_230663       | 415 | 7  | 0.61 | 0.81 | -0.31 | 6  | 8.64  | 0.58 | 0.88 | -0.18 | 7  | 15.28 |
| gi 321450822 gb EFX62690.1  | hypothetical protein DAPPUDRAFT_300650       | 415 | 6  | 0.59 | 0.78 | -0.36 | 6  | 20.99 | 0.44 | 0.67 | -0.58 | 6  | 13.48 |
| gi 321478469 gb EFX89426.1  | hypothetical protein DAPPUDRAFT_303036       | 412 | 4  | 0.81 | 1.07 | 0.10  | 4  | 23.16 | 1.23 | 1.87 | 0.91  | 4  | 30.15 |
| gi 321470994 gb EFX81968.1  | hypothetical protein DAPPUDRAFT_302823       | 408 | 7  | 0.70 | 0.92 | -0.11 | 7  | 11.31 | 0.54 | 0.82 | -0.28 | 7  | 10.92 |
| gi 321460465 gb EFX71507.1  | hypothetical protein DAPPUDRAFT_308832       | 406 | 6  | 0.82 | 1.08 | 0.11  | 6  | 6.85  | 0.71 | 1.08 | 0.11  | 6  | 4.12  |
| gi 321479214 gb EFX90170.1  | hypothetical protein DAPPUDRAFT_299973       | 399 | 6  | 0.66 | 0.87 | -0.20 | 6  | 26.58 | 0.62 | 0.94 | -0.08 | 6  | 6.64  |
| gi 321461668 gb EFX72698.1  | hypothetical protein DAPPUDRAFT_200882       | 397 | 6  | 0.89 | 1.17 | 0.23  | 6  | 18.28 | 0.79 | 1.20 | 0.27  | 6  | 11.38 |
| gi 321478958 gb EFX89914.1  | hypothetical protein DAPPUDRAFT_299809       | 397 | 7  | 0.78 | 1.03 | 0.04  | 7  | 23.00 | 0.67 | 1.02 | 0.03  | 7  | 16.62 |
| gi 321460170 gb EFX71215.1  | hypothetical protein DAPPUDRAFT_309186       | 396 | 7  | 0.66 | 0.87 | -0.20 | 7  | 10.87 | 0.60 | 0.91 | -0.13 | 7  | 12.13 |
| gi 321462188 gb EFX73213.1  | hypothetical protein DAPPUDRAFT_58148        | 390 | 5  | 0.73 | 0.96 | -0.05 | 5  | 7.99  | 0.51 | 0.78 | -0.36 | 5  | 14.78 |
| gi 69466971 emb CAF872313.1 | aconitase                                    | 383 | 7  | 0.60 | 0.79 | -0.34 | 7  | 33.61 | 0.50 | 0.76 | -0.39 | 6  | 13.98 |
| gi 321467151 gb EFX78142.1  | hemoglobin                                   | 382 | 5  | 0.62 | 0.82 | -0.29 | 5  | 34.67 | 0.95 | 1.45 | 0.53  | 5  | 36.56 |
| gi 321477678 gb EFX88636.1  | hypothetical protein DAPPUDRAFT_220840       | 378 | 8  | 0.92 | 1.21 | 0.28  | 8  | 15.73 | 0.67 | 1.02 | 0.03  | 8  | 13.86 |
| gi 321477130 gb EFX80809.1  | hemoglobin                                   | 377 | 2  | 0.57 | 0.75 | -0.41 | 2  | 20.86 | 1.10 | 1.68 | 0.74  | 2  | 41.15 |
| gi 321470486 gb EFX81462.1  | hypothetical protein DAPPUDRAFT_303431       | 374 | 6  | 0.87 | 1.15 | 0.20  | 6  | 28.59 | 0.57 | 0.87 | -0.20 | 6  | 22.38 |
| gi 321464677 gb EFX75683.1  | alpha amylase                                | 371 | 6  | 0.62 | 0.82 | -0.29 | 6  | 23.18 | 0.60 | 0.91 | -0.13 | 6  | 17.24 |
| gi 321477810 gb EFX88768.1  | hypothetical protein DAPPUDRAFT_220996       | 366 | 7  | 0.71 | 0.94 | -0.09 | 7  | 18.76 | 0.60 | 0.91 | -0.13 | 7  | 10.49 |
| gi 321460730 gb EFX71770.1  | hypothetical protein DAPPUDRAFT_227800       | 366 | 1  | 0.59 | 0.78 | -0.36 | 1  |       | 0.48 | 0.73 | -0.45 | 1  |       |
| gi 321463582 gb EFX74597.1  | hypothetical protein DAPPUDRAFT_226650       | 363 | 6  | 0.70 | 0.92 | -0.11 | 6  | 11.78 | 0.57 | 0.87 | -0.20 | 6  | 17.56 |
| gi 321479310 gb EFX90266.1  | hypothetical protein DAPPUDRAFT_299917       | 362 | 8  | 0.76 | 1.00 | 0.00  | 8  | 35.76 | 0.53 | 0.81 | -0.31 | 8  | 28.17 |
| gi 321469582 gb EFX80562.1  | hypothetical protein DAPPUDRAFT_188180       | 361 | 7  | 0.58 | 0.77 | -0.39 | 7  | 35.83 | 0.50 | 0.76 | -0.39 | 7  | 18.57 |
| gi 321472567 gb EFX83537.1  | hypothetical protein DAPPUDRAFT_301820       | 359 | 6  | 0.65 | 0.86 | -0.22 | 6  | 13.26 | 0.55 | 0.84 | -0.26 | 6  | 13.70 |
| gi 321460795 gb EFX71833.1  | hypothetical protein DAPPUDRAFT_308675       | 354 | 4  | 1.75 | 2.31 | 1.21  | 4  | 44.80 | 1.13 | 1.72 | 0.78  | 4  | 30.33 |
| gi 321468728 gb EFX79712.1  | hypothetical protein DAPPUDRAFT_304467       | 353 | 7  | 0.65 | 0.86 | -0.22 | 7  | 6.64  | 0.52 | 0.79 | -0.34 | 7  | 20.28 |
| gi 321462724 gb EFX73745.1  | hypothetical protein DAPPUDRAFT_231341       | 348 | 5  | 0.80 | 1.06 | 0.08  | 5  | 12.02 | 0.64 | 0.97 | -0.04 | 5  | 14.14 |
| gi 321471219 gb EFX82192.1  | hypothetical protein DAPPUDRAFT_195644       | 347 | 5  | 0.62 | 0.82 | -0.29 | 5  | 19.80 | 0.61 | 0.93 | -0.11 | 5  | 23.71 |
| gi 321456768 gb EFX67868.1  | hypothetical protein DAPPUDRAFT_231787       | 347 | 6  | 0.76 | 1.00 | 0.00  | 6  | 12.27 | 0.63 | 0.96 | -0.06 | 6  | 20.75 |
| gi 321461640 gb EFX72670.1  | hypothetical protein DAPPUDRAFT_308120       | 345 | 5  | 0.64 | 0.84 | -0.24 | 5  | 8.70  | 0.68 | 1.04 | 0.05  | 5  | 30.72 |
| gi 321471067 gb EFX82041.1  | hypothetical protein DAPPUDRAFT_317030       | 344 | 6  | 0.81 | 1.07 | 0.10  | 6  | 13.49 | 0.78 | 1.19 | 0.25  | 6  | 35.66 |
| gi 321472277 gb EFX83247.1  | hypothetical protein DAPPUDRAFT_315693       | 326 | 5  | 0.76 | 1.00 | 0.00  | 5  | 23.26 | 0.70 | 1.07 | 0.09  | 5  | 13.40 |
| gi 321477204 gb EFX88163.1  | hypothetical protein DAPPUDRAFT_311761       | 323 | 7  | 0.71 | 0.94 | -0.09 | 7  | 7.64  | 0.68 | 1.04 | 0.05  | 7  | 17.96 |
| gi 321461803 gb EFX72831.1  | myosin regulatory light chain                | 317 | 7  | 0.75 | 0.99 | -0.01 | 7  | 31.46 | 0.61 | 0.93 | -0.11 | 7  | 12.21 |
| gi 321463725 gb EFX74739.1  | hypothetical protein DAPPUDRAFT_324047       | 316 | 5  | 0.63 | 0.83 | -0.27 | 5  | 21.18 | 0.66 | 1.01 | 0.01  | 5  | 18.74 |
| gi 321475982 gb EFX86943.1  | hypothetical protein DAPPUDRAFT_312397       | 314 | 6  | 0.65 | 0.86 | -0.22 | 6  | 24.52 | 0.67 | 1.02 | 0.03  | 6  | 67.98 |
| gi 321465459 gb EFX76460.1  | hypothetical protein DAPPUDRAFT_306188       | 309 | 6  | 0.78 | 1.03 | 0.04  | 6  | 25.36 | 0.63 | 0.96 | -0.06 | 6  | 20.09 |
| gi 321469541 gb EFX80521.1  | hypothetical protein DAPPUDRAFT_304112       | 307 | 6  | 0.83 | 1.10 | 0.13  | 6  | 14.89 | 0.70 | 1.07 | 0.09  | 6  | 9.76  |
| gi 321465918 gb EFX76917.1  | hypothetical protein DAPPUDRAFT_106641       | 303 | 2  | 0.85 | 1.12 | 0.17  | 2  | 8.94  | 0.71 | 1.08 | 0.11  | 2  | 4.94  |
| gi 321450742 gb EFX62640.1  | hypothetical protein DAPPUDRAFT_300850       | 301 | 3  | 0.64 | 0.84 | -0.24 | 3  | 7.95  | 0.53 | 0.81 | -0.31 | 3  | 16.74 |
| gi 321479487 gb EFX90443.1  | hypothetical protein DAPPUDRAFT_299795       | 300 | 5  | 0.76 | 1.00 | 0.00  | 5  | 8.17  | 0.57 | 0.87 | -0.20 | 5  | 16.34 |
| gi 321469876 gb EFX80854.1  | hypothetical protein DAPPUDRAFT_303718       | 299 | 5  | 0.73 | 0.96 | -0.05 | 5  | 22.99 | 0.61 | 0.93 | -0.11 | 5  | 36.90 |
| gi 321464735 gb EFX75741.1  | hypothetical protein DAPPUDRAFT_55751        | 299 | 6  | 0.72 | 0.95 | -0.07 | 6  | 12.22 | 0.61 | 0.93 | -0.11 | 6  | 8.05  |
| gi 321459241 gb EFX70296.1  | hypothetical protein DAPPUDRAFT_231628       | 298 | 5  | 0.89 | 1.17 | 0.23  | 5  | 15.71 | 0.56 | 0.85 | -0.23 | 5  | 10.12 |
| gi 321469467 gb EFX80447.1  | hypothetical protein DAPPUDRAFT_243700       | 295 | 5  | 0.50 | 0.66 | -0.60 | 5  | 9.82  | 0.59 | 0.90 | -0.15 | 5  | 12.41 |
| gi 321461136 gb EFX72171.1  | hypothetical protein DAPPUDRAFT_308570       | 295 | 6  | 0.65 | 0.86 | -0.22 | 6  | 27.81 | 0.60 | 0.91 | -0.13 | 6  | 13.36 |
| gi 321452138 gb EFX63600.1  | hypothetical protein DAPPUDRAFT_306997       | 293 | 4  | 0.75 | 0.99 | -0.01 | 4  | 44.27 | 0.68 | 1.04 | 0.05  | 4  | 36.37 |
| gi 321472307 gb EFX83277.1  | hypothetical protein DAPPUDRAFT_240002       | 292 | 6  | 0.73 | 0.96 | -0.05 | 6  | 32.53 | 0.62 | 0.94 | -0.08 | 6  | 20.57 |
| gi 321472254 gb EFX83224.1  | hypothetical protein DAPPUDRAFT_315656       | 289 | 5  | 0.63 | 0.83 | -0.27 | 5  | 30.63 | 0.63 | 0.96 | -0.06 | 5  | 28.00 |
| gi 321476546 gb EFX87506.1  | hypothetical protein DAPPUDRAFT_306375       | 287 | 7  | 0.76 | 1.00 | 0.00  | 7  | 20.07 | 0.68 | 1.04 | 0.05  | 7  | 6.65  |
| gi 321455175 gb EFX66316.1  | hypothetical protein DAPPUDRAFT_302740       | 286 | 3  | 0.74 | 0.98 | -0.03 | 3  | 3.40  | 0.93 | 1.42 | 0.50  | 3  | 19.92 |
| gi 321474545 gb EFX85510.1  | hypothetical protein DAPPUDRAFT_208978       | 281 | 5  | 0.60 | 0.79 | -0.34 | 5  | 14.01 | 0.59 | 0.90 | -0.15 | 5  | 19.14 |
| gi 321463084 gb EFX74102.1  | hypothetical protein DAPPUDRAFT_215225       | 281 | 4  | 1.09 | 1.44 | 0.52  | 4  | 12.72 | 0.84 | 1.28 | 0.36  | 4  | 14.64 |
| gi 321478570 gb EFX89527.1  | hypothetical protein DAPPUDRAFT_303071       | 278 | 5  | 0.67 | 0.88 | -0.18 | 5  | 22.28 | 0.49 | 0.75 | -0.42 | 5  | 7.27  |
| gi 321460290 gb EFX71334.1  | cytosolic malate dehydrogenase               | 276 | 4  | 0.69 | 0.91 | -0.13 | 4  | 11.99 | 0.61 | 0.93 | -0.11 | 4  | 9.02  |
| gi 321468799 gb EFX79782.1  | hypothetical protein DAPPUDRAFT_304363       | 273 | 5  | 0.65 | 0.86 | -0.22 | 5  | 15.40 | 0.75 | 1.14 | 0.19  | 5  | 11.21 |
| gi 321463549 gb EFX74564.1  | Endoribonuclease-like protein                | 269 | 4  | 0.98 | 1.29 | 0.37  | 4  | 34.33 | 0.74 | 1.13 | 0.17  | 4  | 10.04 |
| gi 321458007 gb EFX69083.1  | hypothetical protein DAPPUDRAFT_329474       | 262 | 6  | 0.74 | 0.98 | -0.03 | 6  | 20.84 | 0.54 | 0.82 | -0.28 | 6  | 12.18 |
| gi 321469223 gb EFX80204.1  | hypothetical protein DAPPUDRAFT_243998       | 261 | 5  | 0.84 | 1.11 | 0.15  | 5  | 10.06 | 0.84 | 1.28 | 0.36  | 5  | 15.42 |
| gi 321463232 gb EFX74249.1  | hypothetical protein DAPPUDRAFT_307348       | 258 | 4  | 0.72 | 0.95 | -0.07 | 4  | 14.12 | 0.51 | 0.78 | -0.36 | 4  | 24.45 |
| gi 321479331 gb EFX90287.1  | hypothetical protein DAPPUDRAFT_205304       | 257 | 5  | 1.09 | 1.44 | 0.52  | 5  | 23.35 | 0.63 | 0.96 | -0.06 | 5  | 6.76  |
| gi 321466433 gb EFX77428.1  | hypothetical protein DAPPUDRAFT_213377       | 257 | 3  | 0.76 | 1.00 | 0.00  | 3  | 4.82  | 0.67 | 1.02 | 0.03  | 3  | 34.55 |
| gi 321479130 gb EFX90086.1  | hypothetical protein DAPPUDRAFT_186952       | 256 | 5  | 0.78 | 1.03 | 0.04  | 5  | 21.42 | 0.73 | 1.11 | 0.15  | 5  | 19.57 |
| gi 321466794 gb EFX77787.1  | polyadenylate binding protein, cytoplasmic 1 | 255 | 4  | 0.66 | 0.87 | -0.20 | 4  | 28.68 | 0.67 | 1.02 | 0.03  | 4  | 24.41 |

|                            |                                               |     |   |      |      |       |   |       |      |      |       |   |       |
|----------------------------|-----------------------------------------------|-----|---|------|------|-------|---|-------|------|------|-------|---|-------|
| gi 321470906 gb EFX81880.1 | hypothetical protein DAPPUDRAFT_223934        | 255 | 5 | 0.73 | 0.96 | -0.05 | 5 | 12.94 | 0.62 | 0.94 | -0.08 | 5 | 19.80 |
| gi 321459360 gb EFX70414.1 | hypothetical protein DAPPUDRAFT_13889         | 255 | 3 | 0.84 | 1.11 | 0.15  | 3 | 25.00 | 0.71 | 1.08 | 0.11  | 3 | 15.92 |
| gi 321454341 gb EFX65515.1 | hypothetical protein DAPPUDRAFT_303616        | 255 | 4 | 0.67 | 0.88 | -0.18 | 4 | 6.99  | 0.59 | 0.90 | -0.15 | 4 | 11.83 |
| gi 321458827 gb EFX69889.1 | hypothetical protein DAPPUDRAFT_202596        | 254 | 5 | 0.67 | 0.88 | -0.18 | 5 | 27.41 | 0.61 | 0.93 | -0.11 | 5 | 9.78  |
| gi 321462131 gb EFX73156.1 | hypothetical protein DAPPUDRAFT_307949        | 254 | 4 | 0.64 | 0.84 | -0.24 | 4 | 14.18 | 0.68 | 1.04 | 0.05  | 4 | 5.43  |
| gi 321460488 gb EFX71530.1 | hypothetical protein DAPPUDRAFT_308853        | 252 | 4 | 0.82 | 1.08 | 0.11  | 4 | 19.62 | 0.56 | 0.85 | -0.23 | 4 | 15.05 |
| gi 321478626 gb EFX89583.1 | hypothetical protein DAPPUDRAFT_303213        | 251 | 4 | 0.96 | 1.27 | 0.34  | 4 | 12.52 | 0.67 | 1.02 | 0.03  | 4 | 14.09 |
| gi 321472279 gb EFX83249.1 | hypothetical protein DAPPUDRAFT_239963        | 249 | 4 | 0.84 | 1.11 | 0.15  | 4 | 12.16 | 0.63 | 0.96 | -0.06 | 4 | 4.83  |
| gi 321463844 gb EFX74857.1 | hypothetical protein DAPPUDRAFT_323929        | 249 | 5 | 0.64 | 0.84 | -0.24 | 5 | 22.28 | 0.54 | 0.82 | -0.28 | 5 | 20.36 |
| gi 321459568 gb EFX70620.1 | hypothetical protein DAPPUDRAFT_202253        | 248 | 6 | 0.63 | 0.83 | -0.27 | 6 | 45.19 | 0.54 | 0.82 | -0.28 | 6 | 49.14 |
| gi 321463635 gb EFX74650.1 | hypothetical protein DAPPUDRAFT_231271        | 245 | 3 | 0.81 | 1.07 | 0.10  | 3 | 13.24 | 0.78 | 1.19 | 0.25  | 3 | 8.28  |
| gi 321477028 gb EFX87987.1 | hypothetical protein DAPPUDRAFT_127024        | 245 | 4 | 0.68 | 0.90 | -0.16 | 4 | 8.64  | 0.60 | 0.91 | -0.13 | 4 | 17.39 |
| gi 321479194 gb EFX90150.1 | hypothetical protein DAPPUDRAFT_299958        | 240 | 3 | 0.85 | 1.12 | 0.17  | 2 | 43.91 | 1.08 | 1.64 | 0.72  | 2 | 46.38 |
| gi 321476764 gb EFX87724.1 | hypothetical protein DAPPUDRAFT_207420        | 239 | 5 | 0.73 | 0.96 | -0.05 | 5 | 31.99 | 0.78 | 1.19 | 0.25  | 5 | 35.09 |
| gi 321477760 gb EFX88718.1 | hypothetical protein DAPPUDRAFT_191289        | 239 | 5 | 0.81 | 1.07 | 0.10  | 5 | 16.07 | 0.69 | 1.05 | 0.07  | 5 | 14.14 |
| gi 321477135 gb EFX88094.1 | hypothetical protein DAPPUDRAFT_230333        | 237 | 2 | 0.63 | 0.83 | -0.27 | 2 | 1.12  | 0.91 | 1.39 | 0.47  | 2 | 17.02 |
| gi 321457382 gb EFX68469.1 | hypothetical protein DAPPUDRAFT_301437        | 237 | 5 | 0.96 | 1.27 | 0.34  | 5 | 16.94 | 0.92 | 1.40 | 0.49  | 5 | 12.46 |
| gi 321452529 gb EFX63892.1 | hypothetical protein DAPPUDRAFT_305931        | 229 | 2 | 0.72 | 0.95 | -0.07 | 2 | 2.84  | 0.61 | 0.93 | -0.11 | 2 | 1.30  |
| gi 118428737 gb ABK91577.1 | ferritin 1-like protein A                     | 229 | 4 | 0.91 | 1.20 | 0.26  | 4 | 16.19 | 0.68 | 1.04 | 0.05  | 4 | 7.98  |
| gi 321457567 gb EFX68651.1 | hypothetical protein DAPPUDRAFT_62934         | 227 | 3 | 0.81 | 1.07 | 0.10  | 3 | 5.15  | 0.75 | 1.14 | 0.19  | 3 | 10.81 |
| gi 321470604 gb EFX81580.1 | alpha amylase                                 | 227 | 5 | 0.83 | 1.10 | 0.13  | 5 | 8.55  | 0.82 | 1.25 | 0.32  | 5 | 19.94 |
| gi 321466408 gb EFX77404.1 | hypothetical protein DAPPUDRAFT_305840        | 226 | 5 | 0.70 | 0.92 | -0.11 | 5 | 20.66 | 0.72 | 1.10 | 0.13  | 5 | 21.47 |
| gi 321466169 gb EFX77166.1 | hypothetical protein DAPPUDRAFT_231144        | 226 | 4 | 1.84 | 2.43 | 1.28  | 4 | 14.22 | 0.82 | 1.25 | 0.32  | 4 | 11.81 |
| gi 321463189 gb EFX74207.1 | CtG5-prov protein                             | 226 | 6 | 0.60 | 0.79 | -0.34 | 6 | 12.66 | 0.60 | 0.91 | -0.13 | 6 | 15.55 |
| gi 321463382 gb EFX74398.1 | hypothetical protein DAPPUDRAFT_324371        | 225 | 4 | 0.67 | 0.88 | -0.18 | 4 | 21.52 | 0.55 | 0.84 | -0.26 | 4 | 8.18  |
| gi 321461384 gb EFX72417.1 | hypothetical protein DAPPUDRAFT_308310        | 224 | 5 | 0.73 | 0.96 | -0.05 | 5 | 21.25 | 0.60 | 0.91 | -0.13 | 5 | 27.36 |
| gi 321477133 gb EFX88092.1 | hemoglobin                                    | 223 | 2 | 0.91 | 1.20 | 0.26  | 2 | 3.77  | 0.83 | 1.26 | 0.34  | 2 | 14.63 |
| gi 118428732 gb ABK91575.1 | ferritin 3-like protein                       | 221 | 3 | 0.83 | 1.10 | 0.13  | 3 | 10.07 | 0.70 | 1.07 | 0.09  | 3 | 1.58  |
| gi 321479312 gb EFX90268.1 | hypothetical protein DAPPUDRAFT_300127        | 219 | 3 | 0.65 | 0.86 | -0.22 | 3 | 12.02 | 0.64 | 0.97 | -0.04 | 3 | 12.40 |
| gi 321474003 gb EFX84969.1 | hypothetical protein DAPPUDRAFT_300830        | 218 | 6 | 0.72 | 0.95 | -0.07 | 6 | 28.38 | 0.61 | 0.93 | -0.11 | 6 | 13.54 |
| gi 321475817 gb EFX86779.1 | hypothetical protein DAPPUDRAFT_307838        | 217 | 4 | 0.84 | 1.11 | 0.15  | 4 | 5.26  | 0.85 | 1.29 | 0.37  | 4 | 13.56 |
| gi 321474253 gb EFX85218.1 | cellobiohydrolase CHBI                        | 217 | 4 | 0.77 | 1.02 | 0.02  | 4 | 21.28 | 0.92 | 1.40 | 0.49  | 4 | 9.87  |
| gi 321475392 gb EFX86355.1 | hypothetical protein DAPPUDRAFT_92219         | 216 | 4 | 0.65 | 0.86 | -0.22 | 4 | 7.35  | 0.64 | 0.97 | -0.04 | 4 | 14.46 |
| gi 321469976 gb EFX80954.1 | hypothetical protein DAPPUDRAFT_196539        | 215 | 4 | 0.89 | 1.17 | 0.23  | 4 | 30.50 | 0.74 | 1.13 | 0.17  | 4 | 26.95 |
| gi 321460570 gb EFX71611.1 | hypothetical protein DAPPUDRAFT_327006        | 215 | 5 | 0.77 | 1.02 | 0.02  | 5 | 5.38  | 0.66 | 1.01 | 0.01  | 5 | 15.62 |
| gi 321476499 gb EFX87460.1 | hypothetical protein DAPPUDRAFT_221682        | 214 | 4 | 0.73 | 0.96 | -0.05 | 4 | 22.66 | 0.54 | 0.82 | -0.28 | 4 | 4.09  |
| gi 321466956 gb EFX77948.1 | hypothetical protein DAPPUDRAFT_92887         | 212 | 5 | 0.65 | 0.86 | -0.22 | 5 | 14.23 | 0.48 | 0.73 | -0.45 | 5 | 10.90 |
| gi 321472792 gb EFX83761.1 | hypothetical protein DAPPUDRAFT_301656        | 210 | 3 | 0.71 | 0.94 | -0.09 | 3 | 20.21 | 0.82 | 1.25 | 0.32  | 3 | 22.63 |
| gi 321466076 gb EFX77074.1 | hypothetical protein DAPPUDRAFT_213631        | 210 | 4 | 0.82 | 1.08 | 0.11  | 4 | 8.80  | 0.61 | 0.93 | -0.11 | 4 | 10.29 |
| gi 321463584 gb EFX74599.1 | carboxylase:pyruvate/acetyl-coa/propionyl-CoA | 209 | 5 | 0.69 | 0.91 | -0.13 | 5 | 18.45 | 0.53 | 0.81 | -0.31 | 5 | 16.21 |
| gi 321456377 gb EFX67487.1 | hypothetical protein DAPPUDRAFT_302011        | 208 | 3 | 0.52 | 0.69 | -0.54 | 3 | 38.12 | 0.58 | 0.88 | -0.18 | 3 | 19.87 |
| gi 321475291 gb EFX86254.1 | ribosomal protein-like protein S6             | 208 | 4 | 1.71 | 2.26 | 1.17  | 4 | 23.49 | 0.93 | 1.42 | 0.50  | 4 | 49.98 |
| gi 321469198 gb EFX80179.1 | hypothetical protein DAPPUDRAFT_304206        | 207 | 4 | 0.72 | 0.95 | -0.07 | 4 | 6.30  | 0.71 | 1.08 | 0.11  | 4 | 15.86 |
| gi 321464414 gb EFX75422.1 | hypothetical protein DAPPUDRAFT_306806        | 206 | 5 | 0.58 | 0.77 | -0.39 | 5 | 21.74 | 0.55 | 0.84 | -0.26 | 5 | 16.95 |
| gi 321469982 gb EFX80960.1 | trypsin                                       | 205 | 2 | 0.90 | 1.19 | 0.25  | 2 | 25.06 | 0.98 | 1.49 | 0.58  | 2 | 29.04 |
| gi 321470751 gb EFX81726.1 | hypothetical protein DAPPUDRAFT_196131        | 203 | 4 | 0.79 | 1.04 | 0.06  | 4 | 9.95  | 0.82 | 1.25 | 0.32  | 4 | 19.46 |
| gi 321478856 gb EFX89813.1 | hypothetical protein DAPPUDRAFT_232871        | 202 | 3 | 0.60 | 0.79 | -0.34 | 3 | 8.78  | 0.66 | 1.01 | 0.01  | 3 | 10.26 |
| gi 321478821 gb EFX89778.1 | hypothetical protein DAPPUDRAFT_310174        | 200 | 3 | 0.83 | 1.10 | 0.13  | 3 | 7.92  | 0.53 | 0.81 | -0.31 | 3 | 2.56  |
| gi 321457956 gb EFX69032.1 | mitochondrial malate dehydrogenase            | 200 | 2 | 0.62 | 0.82 | -0.29 | 2 | 3.22  | 0.58 | 0.88 | -0.18 | 2 | 10.58 |
| gi 321469833 gb EFX80812.1 | hypothetical protein DAPPUDRAFT_230893        | 199 | 5 | 0.62 | 0.82 | -0.29 | 5 | 18.69 | 0.61 | 0.93 | -0.11 | 5 | 17.61 |
| gi 321478954 gb EFX89910.1 | hypothetical protein DAPPUDRAFT_186898        | 199 | 4 | 0.61 | 0.81 | -0.31 | 4 | 39.70 | 0.63 | 0.96 | -0.06 | 4 | 7.06  |
| gi 321470922 gb EFX81896.1 | hypothetical protein DAPPUDRAFT_302792        | 199 | 5 | 0.72 | 0.95 | -0.07 | 5 | 6.40  | 0.61 | 0.93 | -0.11 | 5 | 18.55 |
| gi 321460664 gb EFX71704.1 | hypothetical protein DAPPUDRAFT_347781        | 198 | 2 | 1.21 | 1.60 | 0.68  | 2 | 25.97 | 0.87 | 1.33 | 0.41  | 2 | 17.08 |
| gi 321455545 gb EFX66674.1 | hypothetical protein DAPPUDRAFT_231811        | 197 | 3 | 0.75 | 0.99 | -0.01 | 3 | 23.84 | 0.72 | 1.10 | 0.13  | 3 | 13.61 |
| gi 321458041 gb EFX69116.1 | hypothetical protein DAPPUDRAFT_93571         | 196 | 3 | 0.69 | 0.91 | -0.13 | 3 | 7.65  | 0.60 | 0.91 | -0.13 | 3 | 9.28  |
| gi 321475463 gb EFX86426.1 | hypothetical protein DAPPUDRAFT_313136        | 195 | 5 | 0.82 | 1.08 | 0.11  | 5 | 17.02 | 0.62 | 0.94 | -0.08 | 5 | 5.02  |
| gi 321455130 gb EFX66272.1 | hypothetical protein DAPPUDRAFT_302765        | 193 | 3 | 1.50 | 1.98 | 0.99  | 3 | 35.71 | 0.73 | 1.11 | 0.15  | 3 | 13.43 |
| gi 321454352 gb EFX65526.1 | hypothetical protein DAPPUDRAFT_333111        | 193 | 4 | 0.78 | 1.03 | 0.04  | 4 | 21.22 | 0.71 | 1.08 | 0.11  | 4 | 15.90 |
| gi 321476311 gb EFX87272.1 | hypothetical protein DAPPUDRAFT_307138        | 193 | 4 | 0.78 | 1.03 | 0.04  | 4 | 11.21 | 0.69 | 1.05 | 0.07  | 4 | 9.36  |
| gi 321463819 gb EFX74832.1 | hypothetical protein DAPPUDRAFT_226547        | 193 | 3 | 0.74 | 0.98 | -0.03 | 3 | 8.69  | 0.63 | 0.96 | -0.06 | 3 | 6.35  |
| gi 321471841 gb EFX82813.1 | hypothetical protein DAPPUDRAFT_48853         | 193 | 3 | 0.53 | 0.70 | -0.52 | 3 | 1.09  | 0.45 | 0.69 | -0.54 | 3 | 2.56  |
| gi 321474219 gb EFX85184.1 | hypothetical protein DAPPUDRAFT_300212        | 192 | 5 | 0.98 | 1.29 | 0.37  | 5 | 15.31 | 0.59 | 0.90 | -0.15 | 5 | 22.33 |
| gi 321479197 gb EFX90153.1 | hypothetical protein DAPPUDRAFT_232691        | 191 | 5 | 1.02 | 1.35 | 0.43  | 5 | 21.16 | 0.84 | 1.28 | 0.36  | 5 | 25.43 |
| gi 321459586 gb EFX70638.1 | hypothetical protein DAPPUDRAFT_309347        | 189 | 5 | 1.47 | 1.94 | 0.96  | 5 | 13.82 | 0.77 | 1.17 | 0.23  | 5 | 8.94  |
| gi 321469347 gb EFX80327.1 | hypothetical protein DAPPUDRAFT_304064        | 187 | 2 | 0.62 | 0.82 | -0.29 | 2 | 1.68  | 0.50 | 0.76 | -0.39 | 2 | 26.97 |
| gi 321478104 gb EFX89062.1 | fascilin 2-like protein                       | 185 | 4 | 0.86 | 1.14 | 0.18  | 4 | 17.29 | 0.63 | 0.96 | -0.06 | 4 | 6.61  |
| gi 321463146 gb EFX74164.1 | hypothetical protein DAPPUDRAFT_307451        | 184 | 3 | 0.73 | 0.96 | -0.05 | 3 | 8.10  | 0.56 | 0.85 | -0.23 | 3 | 7.81  |
| gi 321463450 gb EFX74466.1 | hypothetical protein DAPPUDRAFT_231299        | 184 | 4 | 0.83 | 1.10 | 0.13  | 4 | 11.33 | 0.52 | 0.79 | -0.34 | 4 | 8.83  |
| gi 321475176 gb EFX86139.1 | hypothetical protein DAPPUDRAFT_193158        | 182 | 4 | 0.88 | 1.16 | 0.22  | 4 | 7.09  | 0.78 | 1.19 | 0.25  | 4 | 18.43 |
| gi 321476510 gb EFX87470.1 | hypothetical protein DAPPUDRAFT_187316        | 182 | 2 | 0.65 | 0.86 | -0.22 | 2 | 23.81 | 0.50 | 0.76 | -0.39 | 2 | 23.17 |
| gi 321472824 gb EFX83793.1 | hypothetical protein DAPPUDRAFT_230652        | 180 | 4 | 0.78 | 1.03 | 0.04  | 3 | 18.51 | 0.59 | 0.90 | -0.15 | 3 | 8.02  |
| gi 321458193 gb EFX69265.1 | hypothetical protein DAPPUDRAFT_301006        | 180 | 4 | 0.96 | 1.27 | 0.34  | 4 | 27.26 | 0.65 | 0.99 | -0.01 | 4 | 18.59 |
| gi 321453930 gb EFX65125.1 | hypothetical protein DAPPUDRAFT_93752         | 180 | 3 | 0.68 | 0.90 | -0.16 | 3 | 4.86  | 0.67 | 1.02 | 0.03  | 3 | 11.31 |
| gi 321478625 gb EFX89582.1 | hypothetical protein DAPPUDRAFT_310489        | 179 | 4 | 0.88 | 1.16 | 0.22  | 4 | 11.52 | 0.87 | 1.33 | 0.41  | 4 | 14.00 |
| gi 321455190 gb EFX66331.1 | hypothetical protein DAPPUDRAFT_229442        | 178 | 2 | 0.78 | 1.03 | 0.04  | 2 | 19.15 | 0.74 | 1.13 | 0.17  | 2 | 9.87  |

|                            |                                                        |     |   |      |      |       |   |       |      |      |       |   |       |
|----------------------------|--------------------------------------------------------|-----|---|------|------|-------|---|-------|------|------|-------|---|-------|
| gi 321478434 gb EFX89391.1 | hypothetical protein DAPPUDRAFT_303199                 | 178 | 4 | 0.65 | 0.86 | -0.22 | 4 | 5.61  | 0.69 | 1.05 | 0.07  | 4 | 17.31 |
| gi 321458009 gb EFX69085.1 | hypothetical protein DAPPUDRAFT_203047                 | 175 | 4 | 0.65 | 0.86 | -0.22 | 4 | 31.49 | 0.58 | 0.88 | -0.18 | 4 | 19.29 |
| gi 321460793 gb EFX71831.1 | hypothetical protein DAPPUDRAFT_308670                 | 174 | 3 | 0.70 | 0.92 | -0.11 | 3 | 21.37 | 0.68 | 1.04 | 0.05  | 3 | 8.71  |
| gi 321473719 gb EFX84686.1 | hypothetical protein DAPPUDRAFT_209520                 | 174 | 4 | 0.75 | 0.99 | -0.01 | 4 | 16.95 | 0.62 | 0.94 | -0.08 | 4 | 14.28 |
| gi 321456474 gb EFX67581.1 | hypothetical protein DAPPUDRAFT_301996                 | 173 | 4 | 0.87 | 1.15 | 0.20  | 4 | 27.95 | 0.83 | 1.26 | 0.34  | 4 | 41.98 |
| gi 321478861 gb EFX89818.1 | hypothetical protein DAPPUDRAFT_303105                 | 172 | 2 | 0.74 | 0.98 | -0.03 | 2 | 7.46  | 0.91 | 1.39 | 0.47  | 2 | 23.44 |
| gi 321466062 gb EFX77060.1 | hypothetical protein DAPPUDRAFT_306004                 | 170 | 2 | 0.70 | 0.92 | -0.11 | 2 | 0.78  | 0.56 | 0.85 | -0.23 | 2 | 2.71  |
| gi 321468595 gb EFX79579.1 | hypothetical protein DAPPUDRAFT_212503                 | 170 | 3 | 0.64 | 0.84 | -0.24 | 3 | 19.25 | 0.55 | 0.84 | -0.26 | 3 | 20.17 |
| gi 321472492 gb EFX83462.1 | hypothetical protein DAPPUDRAFT_315830                 | 170 | 4 | 0.65 | 0.86 | -0.22 | 4 | 9.70  | 0.65 | 0.99 | -0.01 | 4 | 6.51  |
| gi 321456663 gb EFX67764.1 | hypothetical protein DAPPUDRAFT_229131                 | 168 | 3 | 0.91 | 1.20 | 0.26  | 3 | 13.74 | 0.64 | 0.97 | -0.04 | 3 | 19.90 |
| gi 321469969 gb EFX80947.1 | hypothetical protein DAPPUDRAFT_230889                 | 168 | 3 | 0.73 | 0.96 | -0.05 | 3 | 15.84 | 0.67 | 1.02 | 0.03  | 3 | 11.37 |
| gi 321453637 gb EFX64853.1 | hypothetical protein DAPPUDRAFT_231875                 | 167 | 4 | 0.78 | 1.03 | 0.04  | 4 | 5.40  | 0.63 | 0.96 | -0.06 | 4 | 18.28 |
| gi 321477093 gb EFX89052.1 | hypothetical protein DAPPUDRAFT_230323                 | 167 | 4 | 0.75 | 0.99 | -0.01 | 4 | 20.81 | 0.52 | 0.79 | -0.34 | 4 | 6.61  |
| gi 321463792 gb EFX74805.1 | hypothetical protein DAPPUDRAFT_231265                 | 166 | 3 | 0.93 | 1.23 | 0.30  | 3 | 16.10 | 0.70 | 1.07 | 0.09  | 3 | 6.22  |
| gi 321477670 gb EFX88628.1 | lectin, mannose-binding, 1                             | 166 | 4 | 0.71 | 0.94 | -0.09 | 4 | 20.82 | 0.71 | 1.08 | 0.11  | 4 | 23.06 |
| gi 321454138 gb EFX65322.1 | hypothetical protein DAPPUDRAFT_333298                 | 166 | 4 | 0.71 | 0.94 | -0.09 | 4 | 5.54  | 0.59 | 0.90 | -0.15 | 4 | 33.93 |
| gi 321458867 gb EFX69928.1 | hypothetical protein DAPPUDRAFT_61794                  | 165 | 2 | 0.89 | 1.17 | 0.23  | 2 | 2.60  | 0.61 | 0.93 | -0.11 | 2 | 14.69 |
| gi 321475496 gb EFX86459.1 | hypothetical protein DAPPUDRAFT_222083                 | 165 | 2 | 0.90 | 1.19 | 0.25  | 2 | 6.32  | 1.08 | 1.64 | 0.72  | 2 | 6.20  |
| gi 321463251 gb EFX74268.1 | hypothetical protein DAPPUDRAFT_307363                 | 165 | 3 | 0.93 | 1.23 | 0.30  | 3 | 66.44 | 0.64 | 0.97 | -0.04 | 3 | 50.06 |
| gi 321477915 gb EFX88873.1 | hypothetical protein DAPPUDRAFT_230277                 | 164 | 3 | 1.09 | 1.44 | 0.52  | 3 | 9.34  | 0.73 | 1.11 | 0.15  | 3 | 6.34  |
| gi 321461259 gb EFX72293.1 | hypothetical protein DAPPUDRAFT_308328                 | 163 | 2 | 0.71 | 0.94 | -0.09 | 2 | 5.53  | 0.60 | 0.91 | -0.13 | 2 | 6.00  |
| gi 321463282 gb EFX74299.1 | hypothetical protein DAPPUDRAFT_307341                 | 163 | 3 | 0.66 | 0.87 | -0.20 | 3 | 7.60  | 0.57 | 0.87 | -0.20 | 3 | 20.33 |
| gi 321454353 gb EFX65527.1 | hypothetical protein DAPPUDRAFT_93732                  | 162 | 3 | 0.54 | 0.71 | -0.49 | 3 | 9.33  | 0.61 | 0.93 | -0.11 | 3 | 14.17 |
| gi 321476259 gb EFX87220.1 | hypothetical protein DAPPUDRAFT_230436                 | 162 | 2 | 0.91 | 1.20 | 0.26  | 2 | 36.46 | 0.60 | 0.91 | -0.13 | 2 | 8.04  |
| gi 321452618 gb EFX63962.1 | hypothetical protein DAPPUDRAFT_305821                 | 161 | 2 | 0.61 | 0.81 | -0.31 | 2 | 20.34 | 0.66 | 1.01 | 0.01  | 2 | 8.92  |
| gi 321473119 gb EFX84087.1 | hypothetical protein DAPPUDRAFT_230644                 | 161 | 2 | 0.73 | 0.96 | -0.05 | 2 | 34.71 | 0.90 | 1.37 | 0.46  | 2 | 5.20  |
| gi 321468189 gb EFX79175.1 | hypothetical protein DAPPUDRAFT_128589                 | 160 | 2 | 0.79 | 1.04 | 0.06  | 2 | 26.13 | 0.78 | 1.19 | 0.25  | 2 | 21.10 |
| gi 321460980 gb EFX72016.1 | hypothetical protein DAPPUDRAFT_227683                 | 160 | 2 | 0.84 | 1.11 | 0.15  | 2 | 4.42  | 0.63 | 0.96 | -0.06 | 2 | 3.56  |
| gi 321446738 gb EFX60937.1 | hypothetical protein DAPPUDRAFT_19167                  | 159 | 2 | 0.89 | 1.17 | 0.23  | 2 | 18.45 | 0.92 | 1.40 | 0.49  | 2 | 22.35 |
| gi 321456220 gb EFX67333.1 | hypothetical protein DAPPUDRAFT_218706                 | 159 | 4 | 0.76 | 1.00 | 0.00  | 4 | 19.26 | 0.64 | 0.97 | -0.04 | 4 | 16.00 |
| gi 321454589 gb EFX65754.1 | hypothetical protein DAPPUDRAFT_303528                 | 159 | 2 | 1.18 | 1.56 | 0.64  | 2 | 20.52 | 0.57 | 0.87 | -0.20 | 2 | 16.79 |
| gi 321478744 gb EFX89701.1 | hypothetical protein DAPPUDRAFT_303160                 | 159 | 2 | 0.97 | 1.28 | 0.36  | 2 | 33.71 | 1.08 | 1.64 | 0.72  | 2 | 19.17 |
| gi 321473209 gb EFX84177.1 | hypothetical protein DAPPUDRAFT_194717                 | 159 | 3 | 0.55 | 0.73 | -0.46 | 3 | 8.79  | 0.80 | 1.22 | 0.29  | 3 | 28.61 |
| gi 321469993 gb EFX80971.1 | hypothetical protein DAPPUDRAFT_303760                 | 158 | 4 | 0.61 | 0.81 | -0.31 | 4 | 32.58 | 0.72 | 1.10 | 0.13  | 4 | 38.56 |
| gi 321457450 gb EFX68536.1 | hypothetical protein DAPPUDRAFT_189444                 | 158 | 3 | 0.84 | 1.11 | 0.15  | 3 | 9.32  | 0.63 | 0.96 | -0.06 | 3 | 8.76  |
| gi 321462394 gb EFX73418.1 | hypothetical protein DAPPUDRAFT_200523                 | 157 | 3 | 0.74 | 0.98 | -0.03 | 3 | 10.37 | 0.47 | 0.72 | -0.48 | 3 | 13.57 |
| gi 321455138 gb EFX66279.1 | hypothetical protein DAPPUDRAFT_302752                 | 156 | 2 | 0.53 | 0.70 | -0.52 | 2 | 16.95 | 0.63 | 0.96 | -0.06 | 2 | 20.71 |
| gi 321461500 gb EFX72531.1 | hypothetical protein DAPPUDRAFT_326065                 | 156 | 2 | 0.58 | 0.77 | -0.39 | 2 | 11.90 | 0.63 | 0.96 | -0.06 | 2 | 20.81 |
| gi 321459923 gb EFX70971.1 | hypothetical protein DAPPUDRAFT_112232                 | 156 | 3 | 1.35 | 1.78 | 0.83  | 3 | 25.59 | 0.62 | 0.94 | -0.08 | 3 | 6.90  |
| gi 321477777 gb EFX88735.1 | hypothetical protein DAPPUDRAFT_311062                 | 154 | 3 | 0.74 | 0.98 | -0.03 | 3 | 13.66 | 0.86 | 1.31 | 0.39  | 3 | 15.48 |
| gi 321463408 gb EFX74424.1 | hypothetical protein DAPPUDRAFT_108977                 | 153 | 2 | 0.93 | 1.23 | 0.30  | 2 | 2.14  | 0.83 | 1.26 | 0.34  | 2 | 19.58 |
| gi 321477873 gb EFX88831.1 | hypothetical protein DAPPUDRAFT_311200                 | 152 | 4 | 0.77 | 1.02 | 0.02  | 4 | 12.11 | 0.69 | 1.05 | 0.07  | 4 | 21.60 |
| gi 321454132 gb EFX65316.1 | hypothetical protein DAPPUDRAFT_303789                 | 152 | 4 | 0.85 | 1.12 | 0.17  | 4 | 9.23  | 0.71 | 1.08 | 0.11  | 4 | 14.20 |
| gi 321464273 gb EFX75282.1 | hypothetical protein DAPPUDRAFT_226428                 | 150 | 3 | 0.84 | 1.11 | 0.15  | 2 | 32.82 | 0.80 | 1.22 | 0.29  | 2 | 7.13  |
| gi 321452525 gb EFX63888.1 | hypothetical protein DAPPUDRAFT_231915                 | 150 | 3 | 0.82 | 1.08 | 0.11  | 3 | 12.92 | 0.86 | 1.31 | 0.39  | 3 | 24.32 |
| gi 321474831 gb EFX85795.1 | hypothetical protein DAPPUDRAFT_230521                 | 149 | 3 | 0.48 | 0.63 | -0.66 | 3 | 34.22 | 0.49 | 0.75 | -0.42 | 3 | 8.88  |
| gi 321476489 gb EFX87450.1 | hypothetical protein DAPPUDRAFT_207615                 | 149 | 3 | 0.61 | 0.81 | -0.31 | 3 | 4.67  | 0.58 | 0.88 | -0.18 | 3 | 5.15  |
| gi 321456841 gb EFX67939.1 | hypothetical protein DAPPUDRAFT_301730                 | 149 | 2 | 1.43 | 1.89 | 0.92  | 2 | 15.12 | 0.63 | 0.96 | -0.06 | 2 | 15.01 |
| gi 251825189 gb ACT20728.1 | hypothetical protein                                   | 148 | 3 | 0.75 | 0.99 | -0.01 | 3 | 36.12 | 0.56 | 0.85 | -0.23 | 3 | 5.94  |
| gi 321457968 gb EFX69044.1 | hypothetical protein DAPPUDRAFT_114061                 | 147 | 2 | 0.56 | 0.74 | -0.44 | 2 | 9.47  | 0.50 | 0.76 | -0.39 | 2 | 3.09  |
| gi 321465562 gb EFX76562.1 | hypothetical protein DAPPUDRAFT_231190                 | 146 | 3 | 0.83 | 1.10 | 0.13  | 3 | 11.07 | 0.66 | 1.01 | 0.01  | 3 | 27.80 |
| gi 321476708 gb EFX87668.1 | hypothetical protein DAPPUDRAFT_306457                 | 145 | 2 | 0.71 | 0.94 | -0.09 | 2 | 13.38 | 0.84 | 1.28 | 0.36  | 2 | 16.29 |
| gi 321451304 gb EFX63002.1 | hypothetical protein DAPPUDRAFT_308727                 | 145 | 3 | 0.66 | 0.87 | -0.20 | 3 | 12.17 | 0.61 | 0.93 | -0.11 | 3 | 32.95 |
| gi 321460494 gb EFX71536.1 | hypothetical protein DAPPUDRAFT_327131                 | 145 | 3 | 0.74 | 0.98 | -0.03 | 3 | 6.08  | 0.57 | 0.87 | -0.20 | 3 | 18.63 |
| gi 321464014 gb EFX75025.1 | hypothetical protein DAPPUDRAFT_214640                 | 144 | 3 | 0.53 | 0.70 | -0.52 | 3 | 10.68 | 0.84 | 1.28 | 0.36  | 3 | 8.39  |
| gi 321475750 gb EFX86712.1 | hypothetical protein DAPPUDRAFT_307788                 | 142 | 3 | 0.75 | 0.99 | -0.01 | 3 | 11.37 | 0.60 | 0.91 | -0.13 | 3 | 19.04 |
| gi 321462613 gb EFX73635.1 | hypothetical protein DAPPUDRAFT_231350                 | 142 | 3 | 0.58 | 0.77 | -0.39 | 3 | 42.76 | 0.51 | 0.78 | -0.36 | 3 | 23.16 |
| gi 321475645 gb EFX86607.1 | beta subunit of putative Na+/K+ ATPase                 | 141 | 3 | 0.85 | 1.12 | 0.17  | 3 | 4.71  | 0.62 | 0.94 | -0.08 | 3 | 9.02  |
| gi 321459849 gb EFX70898.1 | troponin C                                             | 141 | 3 | 0.72 | 0.95 | -0.07 | 3 | 17.01 | 0.62 | 0.94 | -0.08 | 3 | 21.07 |
| gi 321454512 gb EFX65679.1 | hypothetical protein DAPPUDRAFT_303554                 | 141 | 1 | 0.88 | 1.16 | 0.22  | 1 |       | 0.61 | 0.93 | -0.11 | 1 |       |
| gi 321458875 gb EFX69936.1 | hypothetical protein DAPPUDRAFT_231649                 | 140 | 2 | 0.54 | 0.71 | -0.49 | 2 | 8.09  | 0.56 | 0.85 | -0.23 | 2 | 9.55  |
| gi 321450917 gb EFX62752.1 | hypothetical protein DAPPUDRAFT_67720                  | 139 | 3 | 0.73 | 0.96 | -0.05 | 3 | 5.07  | 0.53 | 0.81 | -0.31 | 3 | 10.52 |
| gi 321468222 gb EFX79208.1 | hypothetical protein DAPPUDRAFT_304917                 | 138 | 2 | 0.79 | 1.04 | 0.06  | 2 | 24.63 | 0.62 | 0.94 | -0.08 | 2 | 9.36  |
| gi 321478797 gb EFX89754.1 | hypothetical protein DAPPUDRAFT_230146                 | 137 | 3 | 0.78 | 1.03 | 0.04  | 3 | 3.95  | 0.67 | 1.02 | 0.03  | 3 | 26.79 |
| gi 321466157 gb EFX77154.1 | trypsin                                                | 136 | 1 | 1.51 | 1.99 | 1.00  | 1 |       | 1.07 | 1.63 | 0.70  | 1 |       |
| gi 321476699 gb EFX87659.1 | hypothetical protein DAPPUDRAFT_92111                  | 136 | 2 | 0.93 | 1.23 | 0.30  | 2 | 8.62  | 0.47 | 0.72 | -0.48 | 2 | 17.92 |
| gi 321465603 gb EFX76603.1 | hypothetical protein DAPPUDRAFT_198836                 | 136 | 2 | 0.71 | 0.94 | -0.09 | 2 | 20.79 | 0.66 | 1.01 | 0.01  | 2 | 1.90  |
| gi 321478325 gb EFX89282.1 | hypothetical protein DAPPUDRAFT_94765                  | 136 | 3 | 0.57 | 0.75 | -0.41 | 3 | 11.50 | 0.70 | 1.07 | 0.09  | 3 | 23.32 |
| gi 224486469 gb ACN52001.1 | eukaryotic translation initiation factor 2 gamma subur | 135 | 3 | 0.63 | 0.83 | -0.27 | 3 | 15.07 | 0.58 | 0.88 | -0.18 | 3 | 22.11 |
| gi 321458683 gb EFX69747.1 | hypothetical protein DAPPUDRAFT_300691                 | 135 | 2 | 0.57 | 0.75 | -0.41 | 2 | 16.33 | 0.38 | 0.58 | -0.79 | 2 | 17.75 |
| gi 321472519 gb EFX83489.1 | hypothetical protein DAPPUDRAFT_315775                 | 134 | 3 | 0.93 | 1.23 | 0.30  | 3 | 26.60 | 1.10 | 1.68 | 0.74  | 3 | 14.24 |
| gi 321467452 gb EFX78442.1 | hypothetical protein DAPPUDRAFT_213033                 | 134 | 2 | 0.69 | 0.91 | -0.13 | 2 | 55.47 | 0.70 | 1.07 | 0.09  | 2 | 5.49  |
| gi 321471291 gb EFX82264.1 | hypothetical protein DAPPUDRAFT_302655                 | 133 | 2 | 0.84 | 1.11 | 0.15  | 2 | 11.53 | 0.74 | 1.13 | 0.17  | 2 | 2.18  |
| gi 321469684 gb EFX80663.1 | hypothetical protein DAPPUDRAFT_303852                 | 133 | 2 | 0.64 | 0.84 | -0.24 | 2 | 11.64 | 0.55 | 0.84 | -0.26 | 2 | 4.83  |
| gi 321464243 gb EFX75252.1 | hypothetical protein DAPPUDRAFT_323527                 | 133 | 3 | 0.69 | 0.91 | -0.13 | 3 | 7.92  | 0.75 | 1.14 | 0.19  | 3 | 10.10 |

|                            |                                                   |     |   |      |      |       |   |       |      |      |       |   |       |
|----------------------------|---------------------------------------------------|-----|---|------|------|-------|---|-------|------|------|-------|---|-------|
| gi 321469677 gb EFX80656.1 | hypothetical protein DAPPUDRAFT_92663             | 132 | 1 | 0.51 | 0.67 | -0.57 | 1 |       | 0.55 | 0.84 | -0.26 | 1 |       |
| gi 321477362 gb EFX88321.1 | hypothetical protein DAPPUDRAFT_305501            | 132 | 2 | 0.99 | 1.31 | 0.39  | 2 | 5.73  | 0.83 | 1.26 | 0.34  | 2 | 14.30 |
| gi 321460174 gb EFX71219.1 | twinstar-like protein                             | 132 | 2 | 0.70 | 0.92 | -0.11 | 2 | 3.49  | 0.58 | 0.88 | -0.18 | 2 | 9.91  |
| gi 321471426 gb EFX82399.1 | hypothetical protein DAPPUDRAFT_302545            | 132 | 1 | 0.81 | 1.07 | 0.10  | 1 |       | 0.80 | 1.22 | 0.29  | 1 |       |
| gi 321471002 gb EFX81976.1 | hypothetical protein DAPPUDRAFT_230815            | 132 | 2 | 0.58 | 0.77 | -0.39 | 2 | 0.80  | 0.90 | 1.37 | 0.46  | 2 | 6.42  |
| gi 321461575 gb EFX72606.1 | hypothetical protein DAPPUDRAFT_227411            | 131 | 3 | 0.84 | 1.11 | 0.15  | 3 | 27.28 | 0.78 | 1.19 | 0.25  | 3 | 31.81 |
| gi 321459530 gb EFX70582.1 | hypothetical protein DAPPUDRAFT_309373            | 131 | 2 | 0.54 | 0.71 | -0.49 | 2 | 46.85 | 0.67 | 1.02 | 0.03  | 2 | 14.00 |
| gi 321478252 gb EFX89209.1 | hypothetical protein DAPPUDRAFT_220335            | 131 | 2 | 0.67 | 0.88 | -0.18 | 2 | 10.22 | 0.66 | 1.01 | 0.01  | 2 | 3.67  |
| gi 321456658 gb EFX67760.1 | hypothetical protein DAPPUDRAFT_330735            | 131 | 3 | 0.71 | 0.94 | -0.09 | 3 | 17.77 | 0.62 | 0.94 | -0.08 | 3 | 25.21 |
| gi 321459888 gb EFX70936.1 | hypothetical protein DAPPUDRAFT_202014            | 131 | 1 | 0.78 | 1.03 | 0.04  | 1 |       | 0.48 | 0.73 | -0.45 | 1 |       |
| gi 321473980 gb EFX84946.1 | hypothetical protein DAPPUDRAFT_314559            | 130 | 3 | 1.29 | 1.70 | 0.77  | 3 | 15.05 | 0.95 | 1.45 | 0.53  | 3 | 29.73 |
| gi 321479367 gb EFX90323.1 | hypothetical protein DAPPUDRAFT_300086            | 130 | 2 | 0.74 | 0.98 | -0.03 | 2 | 0.01  | 0.51 | 0.78 | -0.36 | 2 | 1.61  |
| gi 321469888 gb EFX80866.1 | hypothetical protein DAPPUDRAFT_303663            | 129 | 1 | 0.52 | 0.69 | -0.54 | 1 |       | 1.09 | 1.66 | 0.73  | 1 |       |
| gi 321470405 gb EFX81381.1 | tsunagi-like protein                              | 129 | 1 | 0.43 | 0.57 | -0.82 | 1 |       | 0.53 | 0.81 | -0.31 | 1 |       |
| gi 321469577 gb EFX80557.1 | guanine nucleotide binding protein, q polypeptide | 129 | 3 | 0.53 | 0.70 | -0.52 | 3 | 6.88  | 0.52 | 0.79 | -0.34 | 3 | 25.71 |
| gi 321470410 gb EFX81386.1 | hypothetical protein DAPPUDRAFT_230846            | 128 | 2 | 0.68 | 0.90 | -0.16 | 2 | 15.68 | 0.53 | 0.81 | -0.31 | 2 | 8.44  |
| gi 321469744 gb EFX80723.1 | hypothetical protein DAPPUDRAFT_303875            | 128 | 2 | 1.02 | 1.35 | 0.43  | 2 | 9.11  | 0.92 | 1.40 | 0.49  | 2 | 16.47 |
| gi 321478432 gb EFX89389.1 | hypothetical protein DAPPUDRAFT_230174            | 127 | 1 | 0.62 | 0.82 | -0.29 | 1 |       | 0.59 | 0.90 | -0.15 | 1 |       |
| gi 321466398 gb EFX77394.1 | hypothetical protein DAPPUDRAFT_305826            | 127 | 3 | 0.80 | 1.06 | 0.08  | 3 | 7.76  | 0.89 | 1.36 | 0.44  | 3 |       |
| gi 321465944 gb EFX76942.1 | hypothetical protein DAPPUDRAFT_305955            | 126 | 3 | 0.66 | 0.87 | -0.20 | 3 | 17.03 | 0.71 | 1.08 | 0.11  | 3 | 22.20 |
| gi 321478223 gb EFX89181.1 | hypothetical protein DAPPUDRAFT_220682            | 125 | 1 | 0.46 | 0.61 | -0.72 | 1 |       | 0.55 | 0.84 | -0.26 | 1 |       |
| gi 321453347 gb EFX64559.1 | hypothetical protein DAPPUDRAFT_304522            | 125 | 3 | 0.58 | 0.77 | -0.39 | 3 | 19.80 | 0.56 | 0.85 | -0.23 | 3 | 4.82  |
| gi 321478261 gb EFX89218.1 | hypothetical protein DAPPUDRAFT_310130            | 125 | 1 | 0.65 | 0.86 | -0.22 | 1 |       | 0.69 | 1.05 | 0.07  | 1 |       |
| gi 321472343 gb EFX83313.1 | hypothetical protein DAPPUDRAFT_230689            | 124 | 2 | 0.73 | 0.96 | -0.05 | 2 | 7.21  | 0.65 | 0.99 | -0.01 | 2 | 0.59  |
| gi 321471988 gb EFX82959.1 | hypothetical protein DAPPUDRAFT_230714            | 122 | 3 | 0.85 | 1.12 | 0.17  | 3 | 3.39  | 0.69 | 1.05 | 0.07  | 3 | 62.64 |
| gi 321461552 gb EFX7258.1  | hypothetical protein DAPPUDRAFT_308183            | 121 | 2 | 0.65 | 0.86 | -0.22 | 2 | 17.32 | 0.57 | 0.87 | -0.20 | 2 | 13.55 |
| gi 321478949 gb EFX80905.1 | hypothetical protein DAPPUDRAFT_299805            | 121 | 2 | 0.85 | 1.12 | 0.17  | 2 | 6.97  | 0.64 | 0.97 | -0.04 | 2 | 17.01 |
| gi 224486457 gb ACN61995.1 | phosphoglucose isomerase                          | 121 | 2 | 0.70 | 0.92 | -0.11 | 2 | 20.97 | 0.69 | 1.05 | 0.07  | 2 | 16.62 |
| gi 321471027 gb EFX82001.1 | hypothetical protein DAPPUDRAFT_302804            | 120 | 1 | 0.41 | 0.54 | -0.89 | 1 |       | 0.68 | 1.04 | 0.05  | 1 |       |
| gi 321471948 gb EFX82920.1 | hypothetical protein DAPPUDRAFT_316208            | 120 | 2 | 0.89 | 1.17 | 0.23  | 2 | 29.55 | 0.80 | 1.22 | 0.29  | 2 | 12.40 |
| gi 321477408 gb EFX88367.1 | hypothetical protein DAPPUDRAFT_305633            | 120 | 1 | 0.64 | 0.84 | -0.24 | 1 |       | 0.79 | 1.20 | 0.27  | 1 |       |
| gi 321474072 gb EFX85038.1 | hypothetical protein DAPPUDRAFT_314456            | 119 | 3 | 0.84 | 1.11 | 0.15  | 3 | 26.84 | 0.75 | 1.14 | 0.19  | 3 |       |
| gi 321474005 gb EFX84971.1 | hypothetical protein DAPPUDRAFT_34614             | 119 | 3 | 1.22 | 1.61 | 0.69  | 3 | 26.96 | 0.62 | 0.94 | -0.08 | 3 | 10.85 |
| gi 321479123 gb EFX90079.1 | hypothetical protein DAPPUDRAFT_309875            | 119 | 1 | 0.80 | 1.06 | 0.08  | 1 |       | 0.95 | 1.45 | 0.53  | 1 |       |
| gi 321462147 gb EFX73172.1 | hypothetical protein DAPPUDRAFT_307954            | 118 | 2 | 0.86 | 1.14 | 0.18  | 2 | 1.95  | 0.96 | 1.46 | 0.55  | 2 | 1.70  |
| gi 321460188 gb EFX71233.1 | hypothetical protein DAPPUDRAFT_309150            | 118 | 2 | 0.59 | 0.78 | -0.36 | 2 | 7.53  | 0.49 | 0.75 | -0.42 | 2 | 13.00 |
| gi 321471827 gb EFX82799.1 | hypothetical protein DAPPUDRAFT_223674            | 118 | 2 | 0.75 | 0.99 | -0.01 | 2 | 1.61  | 0.57 | 0.87 | -0.20 | 2 | 7.19  |
| gi 321478661 gb EFX89618.1 | hypothetical protein DAPPUDRAFT_220530            | 117 | 3 | 0.60 | 0.79 | -0.34 | 3 | 28.31 | 0.56 | 0.85 | -0.23 | 3 | 6.07  |
| gi 321453850 gb EFX65049.1 | hypothetical protein DAPPUDRAFT_265305            | 117 | 1 | 0.78 | 1.03 | 0.04  | 1 |       | 0.64 | 0.97 | -0.04 | 1 |       |
| gi 321461230 gb EFX72264.1 | hypothetical protein DAPPUDRAFT_189030            | 115 | 3 | 0.69 | 0.91 | -0.13 | 3 | 17.88 | 0.65 | 0.99 | -0.01 | 3 | 7.42  |
| gi 321474421 gb EFX85386.1 | hypothetical protein DAPPUDRAFT_300446            | 115 | 2 | 0.59 | 0.78 | -0.36 | 2 | 6.92  | 0.56 | 0.85 | -0.23 | 2 | 0.48  |
| gi 321464706 gb EFX75712.1 | hypothetical protein DAPPUDRAFT_306633            | 115 | 2 | 0.76 | 1.00 | 0.00  | 2 | 19.81 | 0.63 | 0.96 | -0.06 | 2 | 1.24  |
| gi 321463221 gb EFX74238.1 | putative glycogen synthase                        | 114 | 2 | 0.87 | 1.15 | 0.20  | 2 | 11.80 | 0.78 | 1.19 | 0.25  | 2 | 8.33  |
| gi 321460173 gb EFX71218.1 | proteasome subunit alpha type 6-like protein      | 114 | 3 | 0.66 | 0.87 | -0.20 | 3 | 22.64 | 0.65 | 0.99 | -0.01 | 3 | 13.42 |
| gi 321479301 gb EFX90257.1 | hypothetical protein DAPPUDRAFT_230117            | 113 | 3 | 0.56 | 0.74 | -0.44 | 3 | 36.47 | 0.53 | 0.81 | -0.31 | 3 | 14.56 |
| gi 321461545 gb EFX72576.1 | hypothetical protein DAPPUDRAFT_326141            | 113 | 3 | 0.70 | 0.92 | -0.11 | 3 | 16.19 | 0.59 | 0.90 | -0.15 | 3 | 15.51 |
| gi 321470931 gb EFX81905.1 | hypothetical protein DAPPUDRAFT_302859            | 113 | 2 | 0.87 | 1.15 | 0.20  | 1 |       | 0.59 | 0.90 | -0.15 | 1 |       |
| gi 321457141 gb EFX68233.1 | hypothetical protein DAPPUDRAFT_301497            | 113 | 2 | 0.58 | 0.77 | -0.39 | 2 | 18.10 | 0.70 | 1.07 | 0.09  | 2 | 20.13 |
| gi 321460415 gb EFX71457.1 | nonmuscle myosin essential light chain            | 113 | 2 | 0.70 | 0.92 | -0.11 | 2 | 6.59  | 0.63 | 0.96 | -0.06 | 2 | 5.78  |
| gi 321460829 gb EFX71867.1 | hypothetical protein DAPPUDRAFT_308666            | 112 | 2 | 0.69 | 0.91 | -0.13 | 2 | 9.84  | 0.74 | 1.13 | 0.17  | 2 | 14.96 |
| gi 321456387 gb EFX67497.1 | hypothetical protein DAPPUDRAFT_218652            | 112 | 2 | 0.32 | 0.42 | -1.24 | 2 | 93.25 | 0.58 | 0.88 | -0.18 | 2 | 0.40  |
| gi 321473458 gb EFX84425.1 | hypothetical protein DAPPUDRAFT_230610            | 111 | 2 | 0.81 | 1.07 | 0.10  | 2 | 11.44 | 0.73 | 1.11 | 0.15  | 2 | 23.88 |
| gi 321454284 gb EFX65461.1 | hypothetical protein DAPPUDRAFT_303630            | 111 | 3 | 0.68 | 0.90 | -0.16 | 3 | 23.95 | 0.54 | 0.82 | -0.28 | 3 | 22.26 |
| gi 321452279 gb EFX63703.1 | hypothetical protein DAPPUDRAFT_306608            | 111 | 3 | 0.65 | 0.86 | -0.22 | 3 | 11.17 | 0.54 | 0.82 | -0.28 | 3 | 15.75 |
| gi 321479193 gb EFX90149.1 | hypothetical protein DAPPUDRAFT_300165            | 111 | 3 | 0.73 | 0.96 | -0.05 | 3 | 23.07 | 0.67 | 1.02 | 0.03  | 3 | 18.00 |
| gi 321468258 gb EFX79244.1 | hypothetical protein DAPPUDRAFT_304946            | 110 | 2 | 0.58 | 0.77 | -0.39 | 2 | 0.32  | 0.52 | 0.79 | -0.34 | 2 | 0.71  |
| gi 321459463 gb EFX70516.1 | hypothetical protein DAPPUDRAFT_17080             | 110 | 1 | 0.47 | 0.62 | -0.69 | 1 |       | 0.51 | 0.78 | -0.36 | 1 |       |
| gi 321471829 gb EFX82801.1 | hypothetical protein DAPPUDRAFT_187931            | 110 | 2 | 0.61 | 0.81 | -0.31 | 2 | 10.90 | 0.55 | 0.84 | -0.26 | 2 | 7.09  |
| gi 321473827 gb EFX84793.1 | hypothetical protein DAPPUDRAFT_314322            | 110 | 2 | 0.70 | 0.92 | -0.11 | 2 | 17.73 | 0.61 | 0.93 | -0.11 | 2 | 12.21 |
| gi 321464384 gb EFX75392.1 | hypothetical protein DAPPUDRAFT_306788            | 109 | 3 | 0.77 | 1.02 | 0.02  | 3 | 8.24  | 0.73 | 1.11 | 0.15  | 3 | 7.42  |
| gi 321467260 gb EFX78251.1 | hypothetical protein DAPPUDRAFT_213150            | 109 | 2 | 0.54 | 0.71 | -0.49 | 2 | 5.31  | 0.48 | 0.73 | -0.45 | 2 | 6.97  |
| gi 321475533 gb EFX86495.1 | hypothetical protein DAPPUDRAFT_307738            | 109 | 2 | 0.66 | 0.87 | -0.20 | 2 | 7.55  | 0.61 | 0.93 | -0.11 | 2 | 3.74  |
| gi 321467451 gb EFX78441.1 | hypothetical protein DAPPUDRAFT_305165            | 109 | 2 | 0.73 | 0.96 | -0.05 | 2 | 15.67 | 0.73 | 1.11 | 0.15  | 2 | 8.78  |
| gi 321472487 gb EFX83457.1 | hypothetical protein DAPPUDRAFT_301953            | 108 | 2 | 0.87 | 1.15 | 0.20  | 2 | 21.79 | 0.67 | 1.02 | 0.03  | 2 | 9.41  |
| gi 321469205 gb EFX80186.1 | hypothetical protein DAPPUDRAFT_35768             | 108 | 2 | 0.72 | 0.95 | -0.07 | 2 | 4.59  | 0.61 | 0.93 | -0.11 | 2 | 3.80  |
| gi 321458668 gb EFX69732.1 | hypothetical protein DAPPUDRAFT_300699            | 106 | 2 | 0.62 | 0.82 | -0.29 | 2 | 10.17 | 0.56 | 0.85 | -0.23 | 2 | 9.59  |
| gi 321453633 gb EFX64849.1 | hypothetical protein DAPPUDRAFT_219465            | 106 | 2 | 0.92 | 1.21 | 0.28  | 2 | 3.88  | 0.60 | 0.91 | -0.13 | 2 | 12.95 |
| gi 321478127 gb EFX89085.1 | hypothetical protein DAPPUDRAFT_230219            | 105 | 2 | 1.17 | 1.54 | 0.63  | 2 | 7.92  | 0.68 | 1.04 | 0.05  | 2 | 5.53  |
| gi 321470507 gb EFX81483.1 | hypothetical protein DAPPUDRAFT_224278            | 103 | 2 | 0.80 | 1.06 | 0.08  | 1 |       | 0.60 | 0.91 | -0.13 | 1 |       |
| gi 321476116 gb EFX87077.1 | hypothetical protein DAPPUDRAFT_221812            | 103 | 3 | 0.82 | 1.08 | 0.11  | 3 | 30.12 | 0.66 | 1.01 | 0.01  | 3 | 28.60 |
| gi 321469478 gb EFX80458.1 | hypothetical protein DAPPUDRAFT_318657            | 102 | 2 | 0.87 | 1.15 | 0.20  | 2 | 24.04 | 0.65 | 0.99 | -0.01 | 2 | 15.08 |
| gi 321469706 gb EFX80685.1 | hypothetical protein DAPPUDRAFT_303877            | 101 | 1 | 0.95 | 1.25 | 0.33  | 1 |       | 0.62 | 0.94 | -0.08 | 1 |       |
| gi 321477956 gb EFX88914.1 | hypothetical protein DAPPUDRAFT_304762            | 101 | 2 | 0.76 | 1.00 | 0.00  | 2 | 14.90 | 0.86 | 1.31 | 0.39  | 2 | 10.70 |
| gi 321464796 gb EFX75802.1 | hypothetical protein DAPPUDRAFT_306648            | 100 | 3 | 0.75 | 0.99 | -0.01 | 3 | 7.82  | 0.70 | 1.07 | 0.09  | 3 | 5.88  |
| gi 321466375 gb EFX77371.1 | hypothetical protein DAPPUDRAFT_305830            | 100 | 1 | 0.79 | 1.04 | 0.06  | 1 |       | 0.60 | 0.91 | -0.13 | 1 |       |

|                            |                                                  |     |   |      |      |       |   |       |      |      |       |   |       |
|----------------------------|--------------------------------------------------|-----|---|------|------|-------|---|-------|------|------|-------|---|-------|
| gi 321459509 gb EFX70562.1 | hypothetical protein DAPPUDRAFT_61224            | 100 | 1 | 0.52 | 0.69 | -0.54 | 1 |       | 0.46 | 0.70 | -0.51 | 1 |       |
| gi 321463090 gb EFX74108.1 | hypothetical protein DAPPUDRAFT_252189           | 99  | 2 | 0.84 | 1.11 | 0.15  | 2 | 22.90 | 0.71 | 1.08 | 0.11  | 2 | 32.93 |
| gi 321458834 gb EFX69895.1 | hypothetical protein DAPPUDRAFT_300630           | 99  | 2 | 0.71 | 0.94 | -0.09 | 2 | 4.81  | 0.65 | 0.99 | -0.01 | 2 | 3.85  |
| gi 321475003 gb EFX85967.1 | hypothetical protein DAPPUDRAFT_309082           | 99  | 2 | 0.73 | 0.96 | -0.05 | 2 | 7.71  | 0.86 | 1.31 | 0.39  | 2 | 30.06 |
| gi 321456911 gb EFX68008.1 | hypothetical protein DAPPUDRAFT_231772           | 98  | 2 | 0.84 | 1.11 | 0.15  | 2 | 0.65  | 0.59 | 0.90 | -0.15 | 2 | 0.00  |
| gi 321466898 gb EFX77891.1 | hypothetical protein DAPPUDRAFT_305318           | 97  | 2 | 0.91 | 1.20 | 0.26  | 2 | 18.97 | 0.58 | 0.88 | -0.18 | 2 | 20.48 |
| gi 321462861 gb EFX73881.1 | hypothetical protein DAPPUDRAFT_57769            | 97  | 2 | 0.62 | 0.82 | -0.29 | 2 | 6.29  | 0.55 | 0.84 | -0.26 | 2 | 5.59  |
| gi 321476731 gb EFX87691.1 | hypothetical protein DAPPUDRAFT_306567           | 97  | 1 | 0.81 | 1.07 | 0.10  | 1 |       | 0.84 | 1.28 | 0.36  | 1 |       |
| gi 321443865 gb EFX60220.1 | hypothetical protein DAPPUDRAFT_344656           | 97  | 2 | 0.66 | 0.87 | -0.20 | 2 | 10.93 | 0.53 | 0.81 | -0.31 | 2 | 8.29  |
| gi 321465932 gb EFX76930.1 | hypothetical protein DAPPUDRAFT_321785           | 96  | 2 | 0.71 | 0.94 | -0.09 | 2 | 7.05  | 0.63 | 0.96 | -0.06 | 2 | 13.60 |
| gi 321475548 gb EFX86510.1 | myosin essential light chain                     | 96  | 1 | 0.85 | 1.12 | 0.17  | 1 |       | 0.67 | 1.02 | 0.03  | 1 |       |
| gi 321468365 gb EFX79350.1 | hypothetical protein DAPPUDRAFT_52572            | 95  | 2 | 0.74 | 0.98 | -0.03 | 2 | 23.96 | 0.39 | 0.59 | -0.75 | 2 | 60.37 |
| gi 321461069 gb EFX72104.1 | hypothetical protein DAPPUDRAFT_111031           | 95  | 1 | 0.55 | 0.73 | -0.46 | 1 |       | 0.65 | 0.99 | -0.01 | 1 |       |
| gi 321473772 gb EFX84739.1 | hypothetical protein DAPPUDRAFT_230600           | 95  | 1 | 0.64 | 0.84 | -0.24 | 1 |       | 0.44 | 0.67 | -0.58 | 1 |       |
| gi 321469586 gb EFX80566.1 | hypothetical protein DAPPUDRAFT_304087           | 94  | 2 | 0.77 | 1.02 | 0.02  | 2 | 29.72 | 0.60 | 0.91 | -0.13 | 2 | 18.27 |
| gi 321472734 gb EFX83703.1 | hypothetical protein DAPPUDRAFT_230667           | 94  | 2 | 0.63 | 0.83 | -0.27 | 2 | 3.51  | 0.58 | 0.88 | -0.18 | 2 | 7.61  |
| gi 321477885 gb EFX88843.1 | guanine nucleotide binding protein, beta subunit | 94  | 1 | 0.74 | 0.98 | -0.03 | 1 |       | 0.83 | 1.26 | 0.34  | 1 |       |
| gi 321456621 gb EFX67723.1 | hypothetical protein DAPPUDRAFT_218600           | 93  | 1 | 0.79 | 1.04 | 0.06  | 1 |       | 0.80 | 1.22 | 0.29  | 1 |       |
| gi 321478961 gb EFX89917.1 | hypothetical protein DAPPUDRAFT_299812           | 93  | 2 | 0.74 | 0.98 | -0.03 | 2 | 22.01 | 0.56 | 0.85 | -0.23 | 2 | 50.02 |
| gi 321479276 gb EFX90232.1 | hypothetical protein DAPPUDRAFT_220226           | 93  | 2 | 0.91 | 1.20 | 0.26  | 2 | 3.18  | 0.72 | 1.10 | 0.13  | 2 | 2.25  |
| gi 321471039 gb EFX82013.1 | hypothetical protein DAPPUDRAFT_302797           | 93  | 1 | 0.56 | 0.74 | -0.44 | 1 |       | 0.47 | 0.72 | -0.48 | 1 |       |
| gi 321451066 gb EFX62845.1 | vitellogenin fused with superoxide dismutase     | 91  | 1 | 0.77 | 1.02 | 0.02  | 1 |       | 0.50 | 0.76 | -0.39 | 1 |       |
| gi 87083602 gb ABD19294.1  | cytochrome oxidase subunit 2                     | 90  | 2 | 0.84 | 1.11 | 0.15  | 2 | 2.01  | 0.73 | 1.11 | 0.15  | 2 | 10.21 |
| gi 321478515 gb EFX89472.1 | hypothetical protein DAPPUDRAFT_303245           | 89  | 2 | 0.47 | 0.62 | -0.49 | 2 | 25.30 | 0.61 | 0.93 | -0.11 | 2 | 41.25 |
| gi 321470414 gb EFX81390.1 | hypothetical protein DAPPUDRAFT_303416           | 89  | 1 | 0.71 | 0.94 | -0.09 | 1 |       | 0.68 | 1.04 | 0.05  | 1 |       |
| gi 321476792 gb EFX87752.1 | hypothetical protein DAPPUDRAFT_312006           | 89  | 1 | 0.63 | 0.83 | -0.27 | 1 |       | 0.56 | 0.85 | -0.23 | 1 |       |
| gi 321457094 gb EFX68187.1 | hypothetical protein DAPPUDRAFT_330309           | 88  | 2 | 0.62 | 0.82 | -0.29 | 2 | 6.77  | 0.61 | 0.93 | -0.11 | 2 | 14.61 |
| gi 321477671 gb EFX88629.1 | hypothetical protein DAPPUDRAFT_41019            | 88  | 2 | 0.76 | 1.00 | 0.00  | 2 | 8.93  | 0.49 | 0.75 | -0.42 | 2 | 31.45 |
| gi 321465961 gb EFX76959.1 | hypothetical protein DAPPUDRAFT_306014           | 88  | 2 | 0.69 | 0.91 | -0.13 | 2 | 4.28  | 0.62 | 0.94 | -0.08 | 2 | 8.59  |
| gi 321472399 gb EFX83369.1 | hypothetical protein DAPPUDRAFT_230702           | 88  | 2 | 1.55 | 2.05 | 1.03  | 2 | 27.55 | 0.74 | 1.13 | 0.17  | 2 | 15.74 |
| gi 321468350 gb EFX79335.1 | hypothetical protein DAPPUDRAFT_244975           | 88  | 2 | 0.52 | 0.69 | -0.54 | 2 | 16.31 | 0.59 | 0.90 | -0.15 | 2 | 2.98  |
| gi 321462347 gb EFX73371.1 | hypothetical protein DAPPUDRAFT_231352           | 87  | 2 | 0.77 | 1.02 | 0.02  | 2 | 6.39  | 0.57 | 0.87 | -0.20 | 2 | 3.68  |
| gi 321475488 gb EFX86451.1 | hypothetical protein DAPPUDRAFT_193096           | 87  | 2 | 0.59 | 0.78 | -0.36 | 2 | 31.05 | 0.53 | 0.81 | -0.31 | 2 | 20.04 |
| gi 321463349 gb EFX74365.1 | hypothetical protein DAPPUDRAFT_231281           | 87  | 2 | 0.59 | 0.78 | -0.36 | 2 | 6.51  | 0.55 | 0.84 | -0.26 | 2 | 2.35  |
| gi 321455300 gb EFX66437.1 | hypothetical protein DAPPUDRAFT_64687            | 87  | 1 | 0.58 | 0.77 | -0.39 | 1 |       | 0.64 | 0.97 | -0.04 | 1 |       |
| gi 321467262 gb EFX78253.1 | hypothetical protein DAPPUDRAFT_231100           | 87  | 1 | 0.80 | 1.06 | 0.08  | 1 |       | 0.53 | 0.81 | -0.31 | 1 |       |
| gi 321461131 gb EFX72166.1 | hypothetical protein DAPPUDRAFT_231465           | 87  | 1 | 0.69 | 0.91 | -0.13 | 1 |       | 1.17 | 1.78 | 0.83  | 1 |       |
| gi 321456733 gb EFX67833.1 | hypothetical protein DAPPUDRAFT_189511           | 87  | 2 | 0.91 | 1.20 | 0.26  | 2 | 44.68 | 0.62 | 0.94 | -0.08 | 2 | 19.08 |
| gi 321472775 gb EFX83744.1 | hypothetical protein DAPPUDRAFT_92408            | 86  | 2 | 0.89 | 1.17 | 0.23  | 2 | 1.62  | 0.62 | 0.94 | -0.08 | 2 | 8.20  |
| gi 321476743 gb EFX87703.1 | hypothetical protein DAPPUDRAFT_230373           | 86  | 1 | 0.62 | 0.82 | -0.29 | 1 |       | 0.61 | 0.93 | -0.11 | 1 |       |
| gi 321450288 gb EFX62364.1 | hypothetical protein DAPPUDRAFT_68048            | 86  | 2 | 0.74 | 0.98 | -0.03 | 2 | 22.19 | 0.58 | 0.88 | -0.18 | 2 | 13.23 |
| gi 321475801 gb EFX86763.1 | hypothetical protein DAPPUDRAFT_307851           | 85  | 1 | 0.64 | 0.84 | -0.24 | 1 |       | 0.66 | 1.01 | 0.01  | 1 |       |
| gi 321458326 gb EFX69396.1 | hypothetical protein DAPPUDRAFT_300959           | 85  | 1 | 0.60 | 0.79 | -0.34 | 1 |       | 0.59 | 0.90 | -0.15 | 1 |       |
| gi 321467258 gb EFX78249.1 | hypothetical protein DAPPUDRAFT_320706           | 85  | 2 | 0.91 | 1.20 | 0.26  | 2 | 11.52 | 0.56 | 0.85 | -0.23 | 2 | 1.90  |
| gi 321455691 gb EFX66817.1 | hypothetical protein DAPPUDRAFT_115970           | 85  | 2 | 0.60 | 0.79 | -0.34 | 2 | 0.14  | 0.52 | 0.79 | -0.34 | 2 | 3.92  |
| gi 321458587 gb EFX69653.1 | hypothetical protein DAPPUDRAFT_202746           | 85  | 2 | 0.74 | 0.98 | -0.03 | 2 | 4.13  | 0.75 | 1.14 | 0.19  | 2 | 12.06 |
| gi 321468052 gb EFX79039.1 | hypothetical protein DAPPUDRAFT_319965           | 84  | 2 | 0.85 | 1.12 | 0.17  | 2 | 16.77 | 0.48 | 0.73 | -0.45 | 2 | 5.53  |
| gi 321468478 gb EFX79463.1 | hypothetical protein DAPPUDRAFT_319543           | 84  | 1 | 0.75 | 0.99 | -0.01 | 1 |       | 0.47 | 0.72 | -0.48 | 1 |       |
| gi 321449913 gb EFX62142.1 | hypothetical protein DAPPUDRAFT_301818           | 84  | 2 | 0.90 | 1.19 | 0.25  | 2 | 2.24  | 0.75 | 1.14 | 0.19  | 2 | 21.26 |
| gi 321464363 gb EFX75371.1 | hypothetical protein DAPPUDRAFT_306783           | 84  | 2 | 0.62 | 0.82 | -0.29 | 2 | 5.92  | 0.67 | 1.02 | 0.03  | 2 | 11.02 |
| gi 321476647 gb EFX87607.1 | hypothetical protein DAPPUDRAFT_192333           | 83  | 2 | 0.60 | 0.79 | -0.34 | 2 | 2.34  | 0.60 | 0.91 | -0.13 | 2 | 7.47  |
| gi 321458004 gb EFX69080.1 | hypothetical protein DAPPUDRAFT_113992           | 82  | 2 | 0.85 | 1.12 | 0.17  | 2 | 28.74 | 0.65 | 0.99 | -0.01 | 2 | 31.16 |
| gi 321469052 gb EFX80034.1 | hypothetical protein DAPPUDRAFT_212220           | 82  | 2 | 0.71 | 0.94 | -0.09 | 2 | 8.55  | 0.56 | 0.85 | -0.23 | 2 | 3.02  |
| gi 321469939 gb EFX80917.1 | hypothetical protein DAPPUDRAFT_230883           | 81  | 1 | 0.93 | 1.23 | 0.30  | 1 |       | 0.66 | 1.01 | 0.01  | 1 |       |
| gi 321453211 gb EFX64469.1 | hypothetical protein DAPPUDRAFT_304893           | 81  | 1 | 0.53 | 0.70 | -0.52 | 1 |       | 0.40 | 0.61 | -0.71 | 1 |       |
| gi 321464090 gb EFX75100.1 | hypothetical protein DAPPUDRAFT_306867           | 79  | 2 | 0.62 | 0.82 | -0.29 | 2 | 4.52  | 0.73 | 1.11 | 0.15  | 2 | 4.09  |
| gi 321463775 gb EFX74788.1 | hypothetical protein DAPPUDRAFT_199712           | 79  | 2 | 0.51 | 0.67 | -0.57 | 2 | 16.63 | 0.59 | 0.90 | -0.15 | 2 | 12.67 |
| gi 321475389 gb EFX86352.1 | hypothetical protein DAPPUDRAFT_308430           | 79  | 2 | 0.55 | 0.73 | -0.46 | 2 | 11.04 | 0.53 | 0.81 | -0.31 | 2 | 16.65 |
| gi 321458962 gb EFX70021.1 | hypothetical protein DAPPUDRAFT_231646           | 79  | 1 | 1.38 | 1.82 | 0.87  | 1 |       | 1.24 | 1.89 | 0.92  | 1 |       |
| gi 321467279 gb EFX78270.1 | hypothetical protein DAPPUDRAFT_305228           | 78  | 1 | 0.89 | 1.17 | 0.23  | 1 |       | 0.89 | 1.36 | 0.44  | 1 |       |
| gi 321477257 gb EFX88216.1 | leukotriene B4 12-hydroxydehydrogenase           | 78  | 2 | 0.77 | 1.02 | 0.02  | 2 | 1.19  | 0.78 | 1.19 | 0.25  | 2 | 9.44  |
| gi 321476821 gb EFX87781.1 | hypothetical protein DAPPUDRAFT_306505           | 77  | 2 | 0.83 | 1.10 | 0.13  | 2 | 26.11 | 0.54 | 0.82 | -0.28 | 2 | 25.08 |
| gi 321459347 gb EFX70401.1 | hypothetical protein DAPPUDRAFT_228312           | 76  | 1 | 0.62 | 0.82 | -0.29 | 1 |       | 0.61 | 0.93 | -0.11 | 1 |       |
| gi 321466064 gb EFX77062.1 | hypothetical protein DAPPUDRAFT_36528            | 76  | 1 | 0.68 | 0.90 | -0.16 | 1 |       | 0.86 | 1.31 | 0.39  | 1 |       |
| gi 321474324 gb EFX85289.1 | hypothetical protein DAPPUDRAFT_300392           | 76  | 1 | 0.65 | 0.86 | -0.22 | 1 |       | 0.75 | 1.14 | 0.19  | 1 |       |
| gi 385048234 gb AFI39878.1 | phosphoglycerate mutase, partial                 | 76  | 1 | 0.59 | 0.78 | -0.36 | 1 |       | 0.87 | 1.33 | 0.41  | 1 |       |
| gi 321463654 gb EFX74668.1 | hypothetical protein DAPPUDRAFT_307002           | 75  | 1 | 0.66 | 0.87 | -0.20 | 1 |       | 0.52 | 0.79 | -0.34 | 1 |       |
| gi 321461982 gb EFX73009.1 | hypothetical protein DAPPUDRAFT_325748           | 75  | 1 | 0.64 | 0.84 | -0.24 | 1 |       | 0.61 | 0.93 | -0.11 | 1 |       |
| gi 321472329 gb EFX83299.1 | hypothetical protein DAPPUDRAFT_195083           | 75  | 1 | 0.87 | 1.15 | 0.20  | 1 |       | 0.76 | 1.16 | 0.21  | 1 |       |
| gi 321459851 gb EFX70900.1 | hypothetical protein DAPPUDRAFT_231574           | 75  | 2 | 1.10 | 1.45 | 0.54  | 2 | 31.29 | 0.56 | 0.85 | -0.23 | 2 | 6.79  |
| gi 321462825 gb EFX73845.1 | hypothetical protein DAPPUDRAFT_57749            | 74  | 1 | 0.79 | 1.04 | 0.06  | 1 |       | 0.82 | 1.25 | 0.32  | 1 |       |
| gi 321464766 gb EFX75772.1 | hypothetical protein DAPPUDRAFT_323032           | 74  | 1 | 0.64 | 0.84 | -0.24 | 1 |       | 0.66 | 1.01 | 0.01  | 1 |       |
| gi 321475384 gb EFX86347.1 | hypothetical protein DAPPUDRAFT_187536           | 74  | 1 | 0.60 | 0.79 | -0.34 | 1 |       | 0.51 | 0.78 | -0.36 | 1 |       |
| gi 321461512 gb EFX72543.1 | hypothetical protein DAPPUDRAFT_31031            | 73  | 2 | 0.68 | 0.90 | -0.16 | 2 | 12.62 | 0.62 | 0.94 | -0.08 | 2 | 7.07  |
| gi 321470897 gb EFX81871.1 | hypothetical protein DAPPUDRAFT_302840           | 73  | 1 | 0.61 | 0.81 | -0.31 | 1 |       | 0.54 | 0.82 | -0.28 | 1 |       |

|                            |                                                             |    |   |      |      |       |   |       |      |       |       |
|----------------------------|-------------------------------------------------------------|----|---|------|------|-------|---|-------|------|-------|-------|
| gi 321457688 gb EFX68769.1 | hypothetical protein DAPPUDRAFT_259577                      | 73 | 1 | 0.94 | 1.24 | 0.31  | 1 | 0.77  | 1.17 | 0.23  | 1     |
| gi 321463574 gb EFX74589.1 | hypothetical protein DAPPUDRAFT_251789                      | 73 | 1 | 0.99 | 1.31 | 0.39  | 1 | 0.65  | 0.99 | -0.01 | 1     |
| gi 321475731 gb EFX86693.1 | hypothetical protein DAPPUDRAFT_208113                      | 73 | 1 | 0.97 | 1.28 | 0.36  | 1 | 0.68  | 1.04 | 0.05  | 1     |
| gi 321448862 gb EFX61611.1 | hypothetical protein DAPPUDRAFT_69104                       | 73 | 1 | 1.05 | 1.39 | 0.47  | 1 | 0.75  | 1.14 | 0.19  | 1     |
| gi 321464654 gb EFX75660.1 | hypothetical protein DAPPUDRAFT_306617                      | 72 | 2 | 1.81 | 2.39 | 1.26  | 2 | 0.68  | 0.92 | 1.40  | 0.49  |
| gi 321457584 gb EFX68668.1 | hypothetical protein DAPPUDRAFT_301272                      | 72 | 1 | 1.15 | 1.52 | 0.60  | 1 | 0.88  | 1.34 | 0.42  | 1     |
| gi 321476572 gb EFX87532.1 | hypothetical protein DAPPUDRAFT_43076                       | 72 | 2 | 0.61 | 0.81 | -0.31 | 2 | 31.44 | 0.52 | 0.79  | -0.34 |
| gi 321469765 gb EFX80744.1 | hypothetical protein DAPPUDRAFT_303864                      | 72 | 2 | 0.63 | 0.83 | -0.27 | 2 | 1.53  | 0.49 | 0.75  | -0.42 |
| gi 321476874 gb EFX87834.1 | hypothetical protein DAPPUDRAFT_306359                      | 72 | 1 | 0.90 | 1.19 | 0.25  | 1 | 0.74  | 1.13 | 0.17  | 1     |
| gi 321471690 gb EFX82662.1 | hypothetical protein DAPPUDRAFT_302384                      | 72 | 2 | 0.87 | 1.15 | 0.20  | 2 | 19.82 | 0.85 | 1.29  | 0.37  |
| gi 321469255 gb EFX80236.1 | hypothetical protein DAPPUDRAFT_212175                      | 71 | 1 | 0.79 | 1.04 | 0.06  | 1 | 0.69  | 1.05 | 0.07  | 1     |
| gi 321466051 gb EFX77049.1 | hypothetical protein DAPPUDRAFT_305966                      | 71 | 2 | 0.65 | 0.86 | -0.22 | 2 | 10.25 | 0.76 | 1.16  | 0.21  |
| gi 321466699 gb EFX77693.1 | hypothetical protein DAPPUDRAFT_305368                      | 71 | 2 | 0.77 | 1.02 | 0.02  | 2 | 6.04  | 0.63 | 0.96  | -0.06 |
| gi 321465866 gb EFX76865.1 | hypothetical protein DAPPUDRAFT_188541                      | 70 | 1 | 0.91 | 1.20 | 0.26  | 1 | 1.02  | 1.55 | 0.64  | 1     |
| gi 321472713 gb EFX83682.1 | Mago nashi-like protein                                     | 70 | 1 | 0.84 | 1.11 | 0.15  | 1 | 0.64  | 0.97 | -0.04 | 1     |
| gi 321459218 gb EFX70274.1 | hypothetical protein DAPPUDRAFT_61492                       | 70 | 1 | 0.88 | 1.16 | 0.22  | 1 | 0.70  | 1.07 | 0.09  | 1     |
| gi 321460306 gb EFX71349.1 | hypothetical protein DAPPUDRAFT_308871                      | 70 | 1 | 0.79 | 1.04 | 0.06  | 1 | 0.80  | 1.22 | 0.29  | 1     |
| gi 321477237 gb EFX88196.1 | hypothetical protein DAPPUDRAFT_305566                      | 70 | 1 | 1.21 | 1.60 | 0.68  | 1 | 0.38  | 0.58 | -0.79 | 1     |
| gi 321473024 gb EFX83992.1 | hypothetical protein DAPPUDRAFT_230628                      | 69 | 1 | 0.68 | 0.90 | -0.16 | 1 | 0.78  | 1.19 | 0.25  | 1     |
| gi 321469858 gb EFX80837.1 | hypothetical protein DAPPUDRAFT_303819                      | 69 | 1 | 0.71 | 0.94 | -0.09 | 1 | 0.89  | 1.36 | 0.44  | 1     |
| gi 321477010 gb EFX87969.1 | hypothetical protein DAPPUDRAFT_305476                      | 69 | 1 | 0.62 | 0.82 | -0.29 | 1 | 0.43  | 0.65 | -0.61 | 1     |
| gi 321478472 gb EFX89429.1 | hypothetical protein DAPPUDRAFT_310496                      | 69 | 2 | 0.77 | 1.02 | 0.02  | 2 | 11.62 | 0.70 | 1.07  | 0.09  |
| gi 321463810 gb EFX74023.1 | hypothetical protein DAPPUDRAFT_56587                       | 68 | 1 | 0.67 | 0.88 | -0.18 | 1 | 0.55  | 0.84 | -0.26 | 1     |
| gi 321463599 gb EFX74614.1 | hypothetical protein DAPPUDRAFT_307186                      | 66 | 1 | 0.91 | 1.20 | 0.26  | 1 | 0.68  | 1.04 | 0.05  | 1     |
| gi 321469667 gb EFX80646.1 | hypothetical protein DAPPUDRAFT_303911                      | 66 | 1 | 0.61 | 0.81 | -0.31 | 1 | 0.50  | 0.76 | -0.39 | 1     |
| gi 321461006 gb EFX72042.1 | hypothetical protein DAPPUDRAFT_59467                       | 66 | 1 | 0.81 | 1.07 | 0.10  | 1 | 0.71  | 1.08 | 0.11  | 1     |
| gi 321477120 gb EFX88079.1 | hypothetical protein DAPPUDRAFT_305695                      | 66 | 1 | 0.80 | 1.06 | 0.08  | 1 | 0.46  | 0.70 | -0.51 | 1     |
| gi 321465554 gb EFX76555.1 | hypothetical protein DAPPUDRAFT_306118                      | 65 | 1 | 0.67 | 0.88 | -0.18 | 1 | 0.58  | 0.88 | -0.18 | 1     |
| gi 321449591 gb EFX61969.1 | hypothetical protein DAPPUDRAFT_337718                      | 65 | 1 | 0.79 | 1.04 | 0.06  | 1 | 0.74  | 1.13 | 0.17  | 1     |
| gi 321474150 gb EFX85116.1 | hypothetical protein DAPPUDRAFT_230571                      | 65 | 1 | 0.92 | 1.21 | 0.28  | 1 | 0.58  | 0.88 | -0.18 | 1     |
| gi 321458684 gb EFX69748.1 | hypothetical protein DAPPUDRAFT_300690                      | 64 | 1 | 0.49 | 0.65 | -0.63 | 1 | 0.43  | 0.65 | -0.61 | 1     |
| gi 321476735 gb EFX87695.1 | hypothetical protein DAPPUDRAFT_306433                      | 64 | 1 | 0.65 | 0.86 | -0.22 | 1 | 0.60  | 0.91 | -0.13 | 1     |
| gi 321476616 gb EFX87576.1 | hypothetical protein DAPPUDRAFT_42792                       | 63 | 1 | 1.02 | 1.35 | 0.43  | 1 | 0.78  | 1.19 | 0.25  | 1     |
| gi 321455025 gb EFX66171.1 | ABC protein, subfamily ABCF                                 | 62 | 1 | 0.57 | 0.75 | -0.41 | 1 | 0.70  | 1.07 | 0.09  | 1     |
| gi 321455173 gb EFX66314.1 | hypothetical protein DAPPUDRAFT_332314                      | 62 | 1 | 0.87 | 1.15 | 0.20  | 1 | 0.70  | 1.07 | 0.09  | 1     |
| gi 321468545 gb EFX79529.1 | hypothetical protein DAPPUDRAFT_304431                      | 62 | 1 | 0.78 | 1.03 | 0.04  | 1 | 0.68  | 1.04 | 0.05  | 1     |
| gi 321464484 gb EFX75492.1 | hypothetical protein DAPPUDRAFT_306823                      | 62 | 1 | 0.77 | 1.02 | 0.02  | 1 | 0.63  | 0.96 | -0.06 | 1     |
| gi 321478088 gb EFX89046.1 | hypothetical protein DAPPUDRAFT_304599                      | 61 | 1 | 0.91 | 1.20 | 0.26  | 1 | 0.84  | 1.28 | 0.36  | 1     |
| gi 321458640 gb EFX69705.1 | hypothetical protein DAPPUDRAFT_113413                      | 61 | 1 | 0.60 | 0.79 | -0.34 | 1 | 0.66  | 1.01 | 0.01  | 1     |
| gi 321468858 gb EFX79841.1 | hypothetical protein DAPPUDRAFT_231006                      | 61 | 1 | 0.60 | 0.79 | -0.34 | 1 | 0.67  | 1.02 | 0.03  | 1     |
| gi 321456944 gb EFX68040.1 | hypothetical protein DAPPUDRAFT_229022                      | 61 | 1 | 0.64 | 0.84 | -0.24 | 1 | 0.87  | 1.33 | 0.41  | 1     |
| gi 321471049 gb EFX82023.1 | hypothetical protein DAPPUDRAFT_302788                      | 61 | 1 | 0.88 | 1.16 | 0.22  | 1 | 0.96  | 1.46 | 0.55  | 1     |
| gi 321471767 gb EFX82739.1 | hypothetical protein DAPPUDRAFT_241024                      | 61 | 1 | 0.71 | 0.94 | -0.09 | 1 | 0.66  | 1.01 | 0.01  | 1     |
| gi 321470386 gb EFX81362.1 | hypothetical protein DAPPUDRAFT_303409                      | 60 | 1 | 0.64 | 0.84 | -0.24 | 1 | 0.50  | 0.76 | -0.39 | 1     |
| gi 321473504 gb EFX84471.1 | hypothetical protein DAPPUDRAFT_194468                      | 59 | 1 | 0.35 | 0.46 | -1.11 | 1 | 0.34  | 0.52 | -0.95 | 1     |
| gi 321457218 gb EFX68309.1 | hypothetical protein DAPPUDRAFT_231749                      | 59 | 1 | 0.77 | 1.02 | 0.02  | 1 | 0.63  | 0.96 | -0.06 | 1     |
| gi 321465734 gb EFX76733.1 | hypothetical protein DAPPUDRAFT_321920                      | 59 | 1 | 0.91 | 1.20 | 0.26  | 1 | 0.79  | 1.20 | 0.27  | 1     |
| gi 321478009 gb EFX88967.1 | hypothetical protein DAPPUDRAFT_304738                      | 59 | 1 | 0.90 | 1.19 | 0.25  | 1 | 0.57  | 0.87 | -0.20 | 1     |
| gi 321474105 gb EFX85071.1 | hypothetical protein DAPPUDRAFT_314411                      | 59 | 1 | 0.83 | 1.10 | 0.13  | 1 | 0.49  | 0.75 | -0.42 | 1     |
| gi 321479196 gb EFX90152.1 | hypothetical protein DAPPUDRAFT_232690                      | 58 | 1 | 0.56 | 0.74 | -0.44 | 1 | 0.65  | 0.99 | -0.01 | 1     |
| gi 321462514 gb EFX73536.1 | hypothetical protein DAPPUDRAFT_325072                      | 58 | 1 | 0.77 | 1.02 | 0.02  | 1 | 0.73  | 1.11 | 0.15  | 1     |
| gi 321479311 gb EFX90267.1 | hypothetical protein DAPPUDRAFT_190185                      | 58 | 1 | 0.62 | 0.82 | -0.29 | 1 | 0.70  | 1.07 | 0.09  | 1     |
| gi 321470439 gb EFX81415.1 | hypothetical protein DAPPUDRAFT_303490                      | 58 | 1 | 0.69 | 0.91 | -0.13 | 1 | 0.60  | 0.91 | -0.13 | 1     |
| gi 321466422 gb EFX77417.1 | hypothetical protein DAPPUDRAFT_305755                      | 58 | 1 | 0.71 | 0.94 | -0.09 | 1 | 0.62  | 0.94 | -0.08 | 1     |
| gi 321478304 gb EFX89261.1 | hypothetical protein DAPPUDRAFT_190546                      | 57 | 1 | 0.69 | 0.91 | -0.13 | 1 | 0.63  | 0.96 | -0.06 | 1     |
| gi 321458979 gb EFX70038.1 | hypothetical protein DAPPUDRAFT_300599                      | 57 | 1 | 0.74 | 0.98 | -0.03 | 1 | 0.87  | 1.33 | 0.41  | 1     |
| gi 321463265 gb EFX74282.1 | hypothetical protein DAPPUDRAFT_200149                      | 57 | 1 | 1.08 | 1.43 | 0.50  | 1 | 0.57  | 0.87 | -0.20 | 1     |
| gi 321477842 gb EFX88800.1 | ABC protein, subfamily ABCF                                 | 57 | 1 | 0.75 | 0.99 | -0.01 | 1 | 0.69  | 1.05 | 0.07  | 1     |
| gi 321451172 gb EFX62911.1 | LOW QUALITY PROTEIN: hypothetical protein DAPPUDRAFT_210496 | 57 | 1 | 0.79 | 1.04 | 0.06  | 1 | 0.72  | 1.10 | 0.13  | 1     |
| gi 321471647 gb EFX82619.1 | hypothetical protein DAPPUDRAFT_311504                      | 57 | 1 | 0.77 | 1.02 | 0.02  | 1 | 0.72  | 1.10 | 0.13  | 1     |
| gi 321477373 gb EFX88332.1 | hypothetical protein DAPPUDRAFT_263361                      | 57 | 1 | 0.87 | 1.15 | 0.20  | 1 | 0.70  | 1.07 | 0.09  | 1     |
| gi 321455182 gb EFX66323.1 | hypothetical protein DAPPUDRAFT_300095                      | 56 | 1 | 0.67 | 0.88 | -0.18 | 1 | 0.76  | 1.16 | 0.21  | 1     |
| gi 321479085 gb EFX90041.1 | hypothetical protein DAPPUDRAFT_254259                      | 56 | 1 | 0.60 | 0.79 | -0.34 | 1 | 0.60  | 0.91 | -0.13 | 1     |
| gi 321461570 gb EFX72601.1 | hypothetical protein DAPPUDRAFT_300994                      | 56 | 1 | 0.85 | 1.12 | 0.17  | 1 | 0.87  | 1.33 | 0.41  | 1     |
| gi 321458264 gb EFX69335.1 | hypothetical protein DAPPUDRAFT_275286                      | 56 | 1 | 0.66 | 0.87 | -0.20 | 1 | 0.70  | 1.07 | 0.09  | 1     |
| gi 321446095 gb EFX60812.1 | hypothetical protein DAPPUDRAFT_230557                      | 56 | 1 | 0.84 | 1.11 | 0.15  | 1 | 0.62  | 0.94 | -0.08 | 1     |
| gi 321474424 gb EFX85389.1 | hypothetical protein DAPPUDRAFT_130340                      | 56 | 1 | 0.99 | 1.31 | 0.39  | 1 | 0.85  | 1.29 | 0.37  | 1     |
| gi 321455451 gb EFX66583.1 | hypothetical protein DAPPUDRAFT_301619                      | 56 | 1 | 0.67 | 0.88 | -0.18 | 1 | 0.60  | 0.91 | -0.13 | 1     |
| gi 321472883 gb EFX83852.1 | hypothetical protein DAPPUDRAFT_65170                       | 55 | 1 | 0.74 | 0.98 | -0.03 | 1 | 0.72  | 1.10 | 0.13  | 1     |
| gi 321454680 gb EFX65841.1 | hypothetical protein DAPPUDRAFT_300595                      | 55 | 1 | 0.80 | 1.06 | 0.08  | 1 | 1.02  | 1.55 | 0.64  | 1     |
| gi 321458953 gb EFX70012.1 | hypothetical protein DAPPUDRAFT_305563                      | 55 | 1 | 0.84 | 1.11 | 0.15  | 1 | 0.58  | 0.88 | -0.18 | 1     |
| gi 321477230 gb EFX88189.1 | hypothetical protein DAPPUDRAFT_307651                      | 55 | 1 | 1.03 | 1.36 | 0.44  | 1 | 0.71  | 1.08 | 0.11  | 1     |
| gi 321462598 gb EFX73620.1 | hypothetical protein DAPPUDRAFT_324586                      | 55 | 1 | 0.98 | 1.29 | 0.37  | 1 | 0.70  | 1.07 | 0.09  | 1     |
| gi 321463174 gb EFX74192.1 | hypothetical protein DAPPUDRAFT_51324                       | 55 | 1 | 0.74 | 0.98 | -0.03 | 1 | 0.72  | 1.10 | 0.13  | 1     |
| gi 321469441 gb EFX80421.1 |                                                             | 55 | 1 | 0.57 | 0.75 | -0.41 | 1 | 0.53  | 0.81 | -0.31 | 1     |

|                               |                                        |    |   |      |      |       |   |      |      |       |   |
|-------------------------------|----------------------------------------|----|---|------|------|-------|---|------|------|-------|---|
| gi 321449874 gb EFX62118.1    | hypothetical protein DAPPUDRAFT_230004 | 54 | 1 | 0.65 | 0.86 | -0.22 | 1 | 0.62 | 0.94 | -0.08 | 1 |
| gi 321469364 gb EFX80344.1    | hypothetical protein DAPPUDRAFT_230922 | 54 | 1 | 0.74 | 0.98 | -0.03 | 1 | 0.44 | 0.67 | -0.58 | 1 |
| gi 321469795 gb EFX80774.1    | hypothetical protein DAPPUDRAFT_50893  | 54 | 1 | 0.74 | 0.98 | -0.03 | 1 | 0.64 | 0.97 | -0.04 | 1 |
| gi 321469254 gb EFX80235.1    | hypothetical protein DAPPUDRAFT_304192 | 53 | 1 | 0.65 | 0.86 | -0.22 | 1 | 0.51 | 0.78 | -0.36 | 1 |
| gi 321470387 gb EFX81363.1    | hypothetical protein DAPPUDRAFT_303461 | 52 | 1 | 0.87 | 1.15 | 0.20  | 1 | 0.68 | 1.04 | 0.05  | 1 |
| gi 321463454 gb EFX74470.1    | hypothetical protein DAPPUDRAFT_307295 | 52 | 1 | 0.61 | 0.81 | -0.31 | 1 | 0.74 | 1.13 | 0.17  | 1 |
| gi 321469840 gb EFX80819.1    | hypothetical protein DAPPUDRAFT_303901 | 52 | 1 | 1.19 | 1.57 | 0.65  | 1 | 0.54 | 0.82 | -0.28 | 1 |
| gi 321475758 gb EFX86720.1    | hypothetical protein DAPPUDRAFT_127356 | 51 | 1 | 0.77 | 1.02 | 0.02  | 1 | 0.51 | 0.78 | -0.36 | 1 |
| gi 321465120 gb EFX76123.1    | hypothetical protein DAPPUDRAFT_306294 | 51 | 1 | 0.86 | 1.14 | 0.18  | 1 | 0.68 | 1.04 | 0.05  | 1 |
| gi 321473391 gb EFX84358.1    | hypothetical protein DAPPUDRAFT_230594 | 51 | 1 | 0.77 | 1.02 | 0.02  | 1 | 0.69 | 1.05 | 0.07  | 1 |
| gi 321473183 gb EFX84151.1    | hypothetical protein DAPPUDRAFT_194753 | 51 | 1 | 0.91 | 1.20 | 0.26  | 1 | 0.89 | 1.36 | 0.44  | 1 |
| gi 321460847 gb EFX71885.1    | hypothetical protein DAPPUDRAFT_93311  | 50 | 1 | 0.71 | 0.94 | -0.09 | 1 | 0.49 | 0.75 | -0.42 | 1 |
| gi 321455561 gb EFX66690.1    | hypothetical protein DAPPUDRAFT_331842 | 50 | 1 | 0.96 | 1.27 | 0.34  | 1 | 0.58 | 0.88 | -0.18 | 1 |
| gi 321470027 gb EFX81005.1    | hypothetical protein DAPPUDRAFT_50689  | 50 | 1 | 0.64 | 0.84 | -0.24 | 1 | 0.33 | 0.50 | -0.99 | 1 |
| gi 321456918 gb EFX68015.1    | hypothetical protein DAPPUDRAFT_301703 | 49 | 1 | 0.60 | 0.79 | -0.34 | 1 | 0.49 | 0.75 | -0.42 | 1 |
| gi 321478929 gb EFX89885.1    | hypothetical protein DAPPUDRAFT_299789 | 49 | 1 | 0.83 | 1.10 | 0.13  | 1 | 0.55 | 0.84 | -0.26 | 1 |
| gi 321463870 gb EFX74882.1    | hypothetical protein DAPPUDRAFT_214647 | 49 | 1 | 1.38 | 1.82 | 0.87  | 1 | 1.29 | 1.96 | 0.97  | 1 |
| gi 321456875 gb EFX67973.1    | hypothetical protein DAPPUDRAFT_301729 | 49 | 1 | 1.63 | 2.15 | 1.11  | 1 | 1.05 | 1.60 | 0.68  | 1 |
| gi 321474032 gb EFX84998.1    | hypothetical protein DAPPUDRAFT_300779 | 49 | 1 | 0.68 | 0.90 | -0.16 | 1 | 0.64 | 0.97 | -0.04 | 1 |
| gi 321464767 gb EFX75773.1    | hypothetical protein DAPPUDRAFT_55687  | 49 | 1 | 0.82 | 1.08 | 0.11  | 1 | 0.80 | 1.22 | 0.29  | 1 |
| gi 321464798 gb EFX75804.1    | hypothetical protein DAPPUDRAFT_306613 | 49 | 1 | 0.73 | 0.96 | -0.05 | 1 | 0.77 | 1.17 | 0.23  | 1 |
| gi 321467624 gb EFX78613.1    | hypothetical protein DAPPUDRAFT_53209  | 48 | 1 | 0.88 | 1.16 | 0.22  | 1 | 0.35 | 0.53 | -0.91 | 1 |
| gi 321465904 gb EFX76903.1    | hypothetical protein DAPPUDRAFT_321961 | 48 | 1 | 0.95 | 1.25 | 0.33  | 1 | 0.71 | 1.08 | 0.11  | 1 |
| gi 321474203 gb EFX85168.1    | hypothetical protein DAPPUDRAFT_98603  | 48 | 1 | 0.58 | 0.77 | -0.39 | 1 | 0.66 | 1.01 | 0.01  | 1 |
| gi 321461874 gb EFX72901.1    | hypothetical protein DAPPUDRAFT_110156 | 48 | 1 | 0.86 | 1.14 | 0.18  | 1 | 0.60 | 0.91 | -0.13 | 1 |
| gi 321457997 gb EFX69071.1    | hypothetical protein DAPPUDRAFT_231717 | 48 | 1 | 0.62 | 0.82 | -0.29 | 1 | 0.55 | 0.84 | -0.26 | 1 |
| gi 321463721 gb EFX74735.1    | hypothetical protein DAPPUDRAFT_307019 | 47 | 1 | 0.60 | 0.79 | -0.34 | 1 | 0.64 | 0.97 | -0.04 | 1 |
| gi 321457097 gb EFX68190.1    | hu li tai shao-like protein            | 47 | 1 | 0.61 | 0.81 | -0.31 | 1 | 0.70 | 1.07 | 0.09  | 1 |
| gi 321456921 gb EFX68018.1    | hypothetical protein DAPPUDRAFT_260737 | 47 | 1 | 0.56 | 0.74 | -0.44 | 1 | 0.70 | 1.07 | 0.09  | 1 |
| gi 321463542 gb EFX74557.1    | hypothetical protein DAPPUDRAFT_307230 | 46 | 1 | 0.81 | 1.07 | 0.10  | 1 | 0.74 | 1.13 | 0.17  | 1 |
| gi 321459348 gb EFX70402.1    | hypothetical protein DAPPUDRAFT_231613 | 46 | 1 | 0.74 | 0.98 | -0.03 | 1 | 0.61 | 0.93 | -0.11 | 1 |
| gi 321460486 gb EFX71528.1    | hypothetical protein DAPPUDRAFT_308825 | 46 | 1 | 0.78 | 1.03 | 0.04  | 1 | 0.41 | 0.62 | -0.68 | 1 |
| gi 321470871 gb EFX81846.1    | hypothetical protein DAPPUDRAFT_49825  | 46 | 1 | 0.71 | 0.94 | -0.09 | 1 | 0.61 | 0.93 | -0.11 | 1 |
| gi 321453842 gb EFX65041.1    | hypothetical protein DAPPUDRAFT_303976 | 46 | 1 | 0.87 | 1.15 | 0.20  | 1 | 0.88 | 1.34 | 0.42  | 1 |
| gi 321477065 gb EFX88024.1    | hypothetical protein DAPPUDRAFT_305659 | 46 | 1 | 1.36 | 1.80 | 0.84  | 1 | 1.04 | 1.58 | 0.66  | 1 |
| gi 321457308 gb EFX68397.1    | hypothetical protein DAPPUDRAFT_114606 | 45 | 1 | 0.60 | 0.79 | -0.34 | 1 | 0.60 | 0.91 | -0.13 | 1 |
| gi 321462616 gb EFX73638.1    | hypothetical protein DAPPUDRAFT_57941  | 45 | 1 | 0.58 | 0.77 | -0.39 | 1 | 1.07 | 1.63 | 0.70  | 1 |
| gi 321458001 gb EFX69077.1    | hypothetical protein DAPPUDRAFT_93573  | 45 | 1 | 0.84 | 1.11 | 0.15  | 1 | 0.74 | 1.13 | 0.17  | 1 |
| gi 321477932 gb EFX88890.1    | hypothetical protein DAPPUDRAFT_191361 | 45 | 1 | 0.71 | 0.94 | -0.09 | 1 | 0.91 | 1.39 | 0.47  | 1 |
| gi 321469546 gb EFX80526.1    | hypothetical protein DAPPUDRAFT_51170  | 45 | 1 | 0.94 | 1.24 | 0.31  | 1 | 0.80 | 1.22 | 0.29  | 1 |
| gi 321472770 gb EFX83739.1    | hypothetical protein DAPPUDRAFT_35278  | 45 | 1 | 0.62 | 0.82 | -0.29 | 1 | 0.72 | 1.10 | 0.13  | 1 |
| gi 321477012 gb EFX87971.1    | hypothetical protein DAPPUDRAFT_305480 | 45 | 1 | 1.10 | 1.45 | 0.54  | 1 | 0.88 | 1.34 | 0.42  | 1 |
| gi 321476460 gb EFX87421.1    | hypothetical protein DAPPUDRAFT_230423 | 45 | 1 | 0.44 | 0.58 | -0.78 | 1 | 0.82 | 1.25 | 0.32  | 1 |
| gi 321460431 gb EFX71473.1    | hypothetical protein DAPPUDRAFT_216637 | 45 | 1 | 0.64 | 0.84 | -0.24 | 1 | 0.73 | 1.11 | 0.15  | 1 |
| gi 321466001 gb EFX76999.1    | hypothetical protein DAPPUDRAFT_54753  | 44 | 1 | 0.72 | 0.95 | -0.07 | 1 | 0.58 | 0.88 | -0.18 | 1 |
| gi 321478069 gb EFX89027.1    | hypothetical protein DAPPUDRAFT_233847 | 44 | 1 | 0.72 | 0.95 | -0.07 | 1 | 0.53 | 0.81 | -0.31 | 1 |
| rndgi 321468943 gb EFX79926.1 | hypothetical protein DAPPUDRAFT_304275 | 44 | 1 | 0.52 | 0.69 | -0.54 | 1 | 0.84 | 1.28 | 0.36  | 1 |
| gi 321465952 gb EFX76950.1    | hypothetical protein DAPPUDRAFT_306007 | 44 | 1 | 0.52 | 0.69 | -0.54 | 1 | 0.56 | 0.85 | -0.23 | 1 |
| gi 321471687 gb EFX82659.1    | hypothetical protein DAPPUDRAFT_316480 | 43 | 1 | 0.47 | 0.62 | -0.69 | 1 | 0.39 | 0.59 | -0.75 | 1 |
| gi 3214770450 gb EFX81426.1   | hypothetical protein DAPPUDRAFT_211388 | 43 | 1 | 0.79 | 1.04 | 0.06  | 1 | 0.60 | 0.91 | -0.13 | 1 |
| gi 321470564 gb EFX81540.1    | hypothetical protein DAPPUDRAFT_242259 | 43 | 1 | 0.62 | 0.82 | -0.29 | 1 | 0.59 | 0.90 | -0.15 | 1 |
| gi 321479184 gb EFX90140.1    | hypothetical protein DAPPUDRAFT_299952 | 43 | 1 | 0.75 | 0.99 | -0.01 | 1 | 0.50 | 0.76 | -0.39 | 1 |
| gi 321462025 gb EFX73052.1    | hypothetical protein DAPPUDRAFT_110168 | 43 | 1 | 0.68 | 0.90 | -0.16 | 1 | 0.61 | 0.93 | -0.11 | 1 |
| gi 321455305 gb EFX66442.1    | hypothetical protein DAPPUDRAFT_302712 | 43 | 1 | 0.65 | 0.86 | -0.22 | 1 | 0.42 | 0.64 | -0.64 | 1 |
| gi 321474232 gb EFX85197.1    | hypothetical protein DAPPUDRAFT_300219 | 43 | 1 | 0.89 | 1.17 | 0.23  | 1 | 0.69 | 1.05 | 0.07  | 1 |
| gi 321467196 gb EFX78187.1    | hypothetical protein DAPPUDRAFT_53556  | 43 | 1 | 0.74 | 0.98 | -0.03 | 1 | 0.62 | 0.94 | -0.08 | 1 |
| gi 321478430 gb EFX89387.1    | hypothetical protein DAPPUDRAFT_190748 | 43 | 1 | 0.93 | 1.23 | 0.30  | 1 | 0.37 | 0.56 | -0.83 | 1 |
| gi 321463457 gb EFX74473.1    | hypothetical protein DAPPUDRAFT_307292 | 43 | 1 | 1.36 | 1.80 | 0.84  | 1 | 0.87 | 1.33 | 0.41  | 1 |
| gi 321460184 gb EFX71229.1    | hypothetical protein DAPPUDRAFT_309154 | 43 | 1 | 1.00 | 1.32 | 0.40  | 1 | 0.79 | 1.20 | 0.27  | 1 |
| gi 321463586 gb EFX74601.1    | Endoribonuclease-like protein          | 43 | 1 | 0.97 | 1.28 | 0.36  | 1 | 0.72 | 1.10 | 0.13  | 1 |
| gi 321477839 gb EFX88797.1    | hypothetical protein DAPPUDRAFT_41744  | 43 | 1 | 0.57 | 0.75 | -0.41 | 1 | 0.50 | 0.76 | -0.39 | 1 |
| gi 321477306 gb EFX88265.1    | hypothetical protein DAPPUDRAFT_305699 | 43 | 1 | 0.51 | 0.67 | -0.57 | 1 | 0.19 | 0.29 | -1.79 | 1 |
| gi 321461226 gb EFX72260.1    | hypothetical protein DAPPUDRAFT_189031 | 42 | 1 | 0.70 | 0.92 | -0.11 | 1 | 0.54 | 0.82 | -0.28 | 1 |
| gi 321460492 gb EFX71534.1    | hypothetical protein DAPPUDRAFT_231518 | 42 | 1 | 0.86 | 1.14 | 0.18  | 1 | 0.76 | 1.16 | 0.21  | 1 |
| rndgi 321463562 gb EFX74577.1 | hypothetical protein DAPPUDRAFT_251813 | 42 | 1 | 1.58 | 2.09 | 1.06  | 1 | 1.09 | 1.66 | 0.73  | 1 |
| gi 321455764 gb EFX66888.1    | hypothetical protein DAPPUDRAFT_203872 | 42 | 1 | 0.62 | 0.82 | -0.29 | 1 | 0.53 | 0.81 | -0.31 | 1 |
| gi 321446057 gb EFX60807.1    | hypothetical protein DAPPUDRAFT_306948 | 42 | 1 | 0.81 | 1.07 | 0.10  | 1 | 0.69 | 1.05 | 0.07  | 1 |
| gi 321465458 gb EFX76459.1    | hypothetical protein DAPPUDRAFT_213970 | 42 | 1 | 0.80 | 1.06 | 0.08  | 1 | 0.94 | 1.43 | 0.52  | 1 |
| gi 321470428 gb EFX81404.1    | hypothetical protein DAPPUDRAFT_50141  | 42 | 1 | 0.33 | 0.44 | -1.20 | 1 | 0.62 | 0.94 | -0.08 | 1 |
| gi 321478269 gb EFX89226.1    | hypothetical protein DAPPUDRAFT_303112 | 42 | 1 | 0.66 | 0.87 | -0.20 | 1 | 0.62 | 0.94 | -0.08 | 1 |
| gi 321452535 gb EFX63898.1    | hypothetical protein DAPPUDRAFT_267459 | 42 | 1 | 0.55 | 0.73 | -0.46 | 1 | 0.66 | 1.01 | 0.01  | 1 |
| gi 321456900 gb EFX67997.1    | hypothetical protein DAPPUDRAFT_203467 | 42 | 1 | 0.68 | 0.90 | -0.16 | 1 | 0.52 | 0.79 | -0.34 | 1 |
| gi 321461486 gb EFX72518.1    | hypothetical protein DAPPUDRAFT_58975  | 42 | 1 | 0.69 | 0.91 | -0.13 | 1 | 0.49 | 0.75 | -0.42 | 1 |
| gi 321478467 gb EFX89424.1    | hypothetical protein DAPPUDRAFT_220567 | 42 | 1 | 0.99 | 1.31 | 0.39  | 1 | 0.58 | 0.88 | -0.18 | 1 |
| gi 321457269 gb EFX68359.1    | hypothetical protein DAPPUDRAFT_203299 | 42 | 1 | 0.86 | 1.14 | 0.18  | 1 | 0.52 | 0.79 | -0.34 | 1 |



|                               |                                        |    |   |      |      |       |   |      |      |       |   |
|-------------------------------|----------------------------------------|----|---|------|------|-------|---|------|------|-------|---|
| gi 321459510 gb EFX70563.1    | hypothetical protein DAPPUDRAFT_61189  | 42 | 1 | 0.82 | 1.08 | 0.11  | 1 | 0.77 | 1.17 | 0.23  | 1 |
| gi 321472821 gb EFX83790.1    | hypothetical protein DAPPUDRAFT_301644 | 42 | 1 | 1.00 | 1.32 | 0.40  | 1 | 0.71 | 1.08 | 0.11  | 1 |
| gi 321456902 gb EFX67999.1    | hypothetical protein DAPPUDRAFT_229061 | 42 | 1 | 0.92 | 1.21 | 0.28  | 1 | 0.68 | 1.04 | 0.05  | 1 |
| gi 321473470 gb EFX84437.1    | hypothetical protein DAPPUDRAFT_301077 | 42 | 1 | 0.94 | 1.24 | 0.31  | 1 | 0.59 | 0.90 | -0.15 | 1 |
| gi 321467552 gb EFX78542.1    | hypothetical protein DAPPUDRAFT_231081 | 41 | 1 | 0.85 | 1.12 | 0.17  | 1 | 0.60 | 0.91 | -0.13 | 1 |
| gi 321478860 gb EFX89817.1    | hypothetical protein DAPPUDRAFT_303106 | 41 | 1 | 1.28 | 1.69 | 0.76  | 1 | 0.72 | 1.10 | 0.13  | 1 |
| gi 321460181 gb EFX71226.1    | hypothetical protein DAPPUDRAFT_309158 | 41 | 1 | 0.54 | 0.71 | -0.49 | 1 | 0.47 | 0.72 | -0.48 | 1 |
| gi 321473760 gb EFX84727.1    | hypothetical protein DAPPUDRAFT_230602 | 41 | 1 | 0.44 | 0.58 | -0.78 | 1 | 0.40 | 0.61 | -0.71 | 1 |
| gi 270299497 gb ACZ68380.1    | Dappu_220747-like protein              | 41 | 1 | 0.70 | 0.92 | -0.11 | 1 | 0.46 | 0.70 | -0.51 | 1 |
| rndgi 321472766 gb EFX83735.1 | hypothetical protein DAPPUDRAFT_301670 | 41 | 1 | 0.88 | 1.16 | 0.22  | 1 | 0.80 | 1.22 | 0.29  | 1 |
| gi 321459984 gb EFX71031.1    | hypothetical protein DAPPUDRAFT_60686  | 41 | 1 | 0.99 | 1.31 | 0.39  | 1 | 0.62 | 0.94 | -0.08 | 1 |
| gi 321479086 gb EFX90042.1    | transformer-2 protein-like protein     | 40 | 1 | 0.53 | 0.70 | -0.52 | 1 | 0.50 | 0.76 | -0.39 | 1 |
| gi 321464142 gb EFX75152.1    | hypothetical protein DAPPUDRAFT_231249 | 40 | 1 | 0.68 | 0.90 | -0.16 | 1 | 0.59 | 0.90 | -0.15 | 1 |
